1 **TITLE:** Autoencoder-based phenotyping of ophthalmic images highlights genetic loci  
2 influencing retinal morphology and provides informative biomarkers.

3

4

5 **AUTHOR LIST & AFFILIATIONS**

6 Panagiotis I. Sergouniotis<sup>1,2,3,4</sup>, Adam Diakite<sup>1</sup>, Kumar Gaurav<sup>1</sup>, Ewan Birney<sup>1</sup>, Tomas  
7 Fitzgerald<sup>1</sup>

8

9 <sup>1</sup> European Molecular Biology Laboratory, European Bioinformatics Institute (EMBL-  
10 EBI), Wellcome Genome Campus, Cambridge, UK.

11

12 <sup>2</sup> Division of Evolution, Infection and Genomics, School of Biological Sciences, Faculty of  
13 Biology, Medicine and Health, University of Manchester, Manchester, UK.

14

15 <sup>3</sup> Manchester Centre for Genomic Medicine, Saint Mary's Hospital, Manchester University  
16 NHS Foundation Trust, Manchester, UK.

17

18 <sup>4</sup> Manchester Royal Eye Hospital, Manchester University NHS Foundation Trust,  
19 Manchester, UK.

20

21

22 Correspondence to:

23 Panagiotis I. Sergouniotis ([panagiotis.sergouniotis@manchester.ac.uk](mailto:panagiotis.sergouniotis@manchester.ac.uk)),

24 Tomas Fitzgerald ([tomas@ebi.ac.uk](mailto:tomas@ebi.ac.uk)).

25

26

27 **ABSTRACT**

28

29 Genome-wide association studies (GWAS) have been remarkably successful in identifying  
30 associations between genetic variation and imaging-derived phenotypes. To date, the main  
31 focus of these analyses has been established, clinically-used imaging features. Here, we  
32 sought to investigate if deep learning approaches can help detect more nuanced patterns of  
33 image variability. To this end, we used an autoencoder to represent retinal optical coherence  
34 tomography (OCT) images from 31,135 UK Biobank participants. For each study subject, we  
35 obtained a 64-dimensional vector representing features of retinal structure. GWAS of these  
36 autoencoder-derived imaging parameters identified 118 statistically significant loci; 17 of  
37 these associations also reached genome-wide significance in a replication analysis that  
38 included 10,409 UK Biobank volunteers. These loci encompassed variants previously linked  
39 with retinal thickness measurements, ophthalmic disorders and/or neurodegenerative  
40 conditions (including dementia). Notably, the generated retinal phenotypes were found to  
41 contribute to predictive models for glaucoma and cardiovascular disorders. Overall, we  
42 demonstrate that self-supervised phenotyping of OCT images enhances the discoverability  
43 of genetic factors influencing retinal morphology and provides epidemiologically informative  
44 biomarkers.

45

46 **KEYWORDS:** autoencoder, U-Net, retinal imaging, optical coherence tomography, imaging-  
47 derived phenotypes

48

49 **MAIN TEXT**

50

51 **INTRODUCTION**

52

53 Imaging technologies have greatly enhanced the scope and precision of phenotype  
54 discovery. A wide range of imaging-derived phenotypes are easily amenable to human  
55 identification and are routinely used in biomedical contexts, including in clinical practice  
56 (Oren 2020). However, to capture the complexity of human biology, there is a need to go  
57 beyond traditional clinically-focused and/or expert-curated imaging features (Gong 2022).

58

59 Artificial neural networks (ANN) are machine-learning models inspired by information  
60 processing in biological neural networks (LeCun 2015; Hinton 2018; Hasson 2020). ANNs  
61 can be used to extract granular information from images without introducing certain biases  
62 associated with human curation. An autoencoder is a type of ANN that is designed to  
63 transform an input set of data into a lower-dimensional code (*i.e.* a set of latent space  
64 variables or 'embeddings') and then to recreate the input from the encoded representation  
65 (Hinton 2006; Michelucci 2022). Broadly, autoencoders can be used to efficiently compress  
66 an image by identifying the key features that lead to optimal reconstruction performance.

67

68 The most optically accessible part of the central nervous system is the retina, the  
69 multilayered tissue that lines the back of the eyes. The retina is particularly vulnerable to  
70 disease, and disruption of its normal architecture (e.g. in conditions like age-related macular  
71 degeneration or glaucoma) can lead to visual disability (Sheffield 2011; Zhao 2023).

72 Examination of the retina relies, to a great extent, on imaging, especially the use of optical  
73 coherence tomography (OCT). OCT is a non-invasive, non-contact method for cross-  
74 sectional imaging that has a resolution approaching that of histopathology (Bouma 2022).

75 Application of ANN-based algorithms in OCT image processing is attracting increasing  
76 attention with key advantages including the rapid speed, high consistency and quantitative  
77 nature of the analyses (De Fauw 2018; Yim 2020; Keenan 2021; Diaz-Pinto 2022).

78

79 To date, genetic studies of imaging phenotypes have mostly focused on features associated  
80 with long-established clinical diagnostic processes (Xie 2022). In our own previous work, we  
81 used standardised OCT-derived thickness measurements of the inner (Currant 2021) and  
82 outer (Currant 2023) retinal layers to good effect, discovering new genetic associations and  
83 exploring relationships with disease. Here we performed genomic analyses on OCT imaging  
84 phenotypes extracted using a self-supervised autoencoder-based approach. We highlight  
85 the autoencoder's ability to derive biologically meaningful phenotypes (with association to

86 genetic variants not seen in previous studies), and to contribute to predictive models for  
87 health outcomes such as glaucoma and cardiovascular conditions.  
88

89 **RESULTS**

90

91 **Obtaining autoencoder-derived phenotypes from OCT images**

92

93 We used OCT images from the UK Biobank, a biomedical resource containing genomic and  
94 health information from >500,000 individuals (Bycroft 2018). After applying standard genetic  
95 and OCT quality control filters (Patel 2016; Curren 2021), we defined a subset of the UK  
96 Biobank population that (i) can be considered genetically well-mixed (*i.e.* includes  
97 participants that were assigned by genotype principal component analysis (PCA) to a cluster  
98 with subjects of mostly European-like ancestries) and (ii) only contains individuals with high-  
99 quality OCT images. This cohort included 31,135 individuals and had a similar sex and age  
100 profile to the overall UK Biobank population (Curren 2023) (**Supplementary Fig.1**). Most  
101 study subjects were female (54%) and self-identified as White British (91%). The mean age  
102 at OCT imaging was 56 years (standard deviation: 8 years).

103

104 Study subjects had an OCT ‘volume scan’ of the central retina in each eye. Each volume  
105 scan contained 128 cross-sectional images and was generated using a horizontal raster  
106 scanning protocol. To extract thickness information and to compress these 128 images into  
107 a single retinal ‘thickness map’, we developed an ANN algorithm involving a U-Net  
108 architecture (Ronneberger 2015) (**Fig.1; Methods**).

109

110 The 31,135 left eye retinal thickness maps that we generated were then used as input to an  
111 autoencoder. This was trained end-to-end for 150 epochs utilising 2500 training and 500 test  
112 images. We explored various embedding dimensionalities and opted for a 64-dimensional  
113 vector (*i.e.* the latent space or ‘bottleneck layer’ contained 64 features) (**Fig.1; Methods**). It  
114 has been previously shown that this autoencoder architecture can sufficiently represent  
115 datasets of similar complexity (Schroff 2015; Song 2015). A reconstruction error of 0.0037  
116 was obtained (**Supplementary Fig.2**).

117

118 The univariate distributions of the 64 embeddings are shown in **Supplementary Fig.3**.

119 Mostly unimodal or bimodal distributions were observed.

120

121 To create an alternative representation allowing information to be combined across different  
122 variables within the latent space, we used the 64 embeddings as input to a PCA. The first 25  
123 principal components, representing 98.5% of the variance within the embeddings, were  
124 studied further and used for genetic association tests.

125

126

127

128  
129

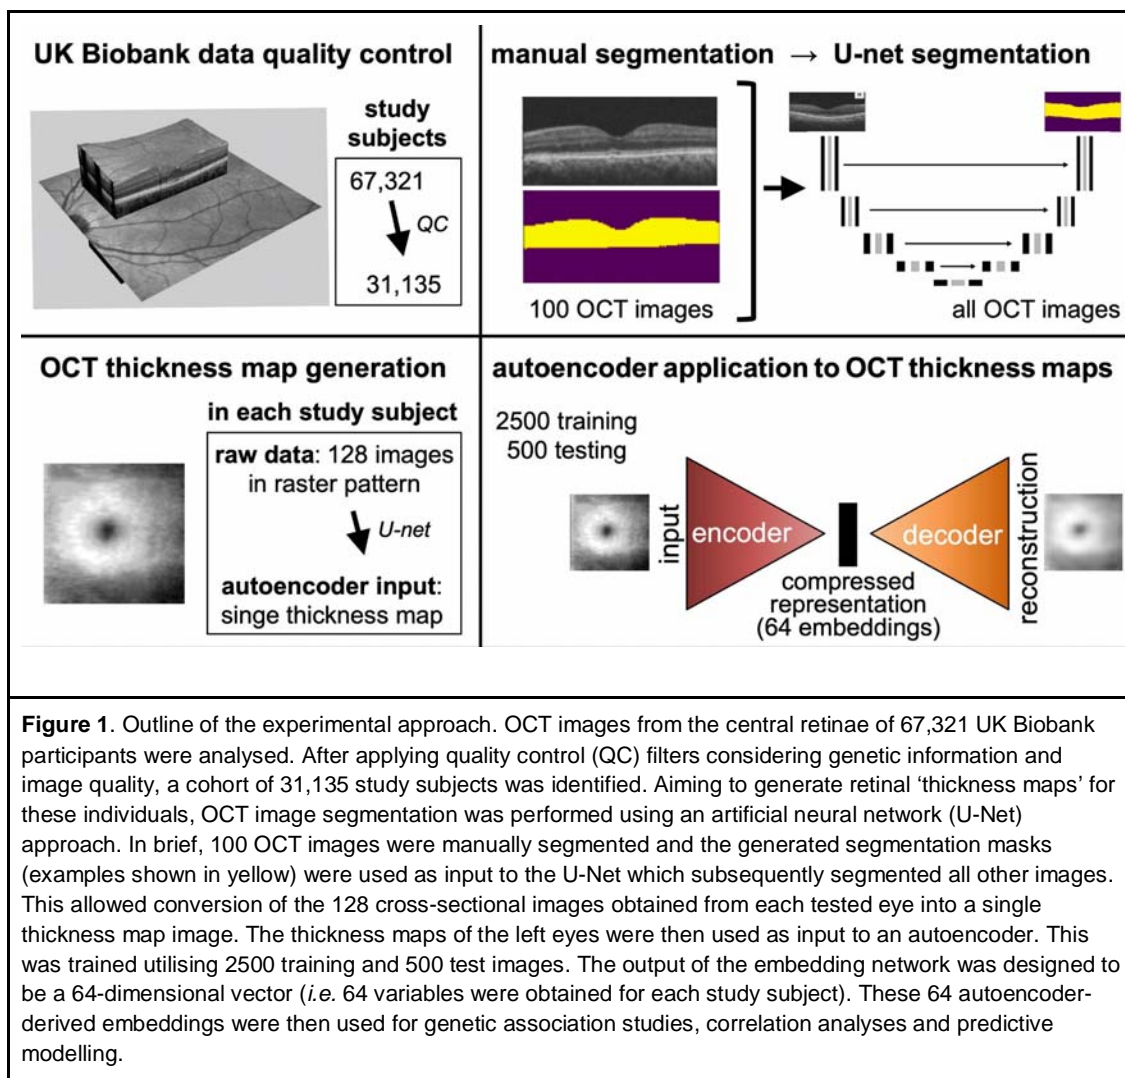

130  
131  
132  
133  
134  
135  
136  
137  
138  
139  
140  
141

### Genetic association studies of autoencoder-derived OCT phenotypes

To look for genetic factors associated with the obtained autoencoder-derived embedded features (*i.e.* the 64 embeddings and the first 25 embedding-related principal components), we performed common-variant genome-wide association studies (GWAS). We used REGENIE (Mbatchou 2021) and incorporated the following set of covariates into the model: age at recruitment, sex, height, weight, refractive error and genetic principal components 1 to 20. Notably, each embedded feature was inverse rank normalised prior to performing genetic association testing. As we anticipated a degree of correlation between autoencoder-derived phenotypes, we also conducted a multi-trait meta-analysis using MTAG (Turley

142 2018). This involved identifying genetically correlated embeddings and leveraging these  
143 relationships to obtain adjusted GWAS results for each of the 64 embeddings (**Methods**).  
144  
145 Overall, 418,312 association signals from 17,022 common variants reached the genome-  
146 wide significance threshold ( $p$ -value  $< 5 \times 10^{-8}$ ) (**Table 1; Fig.2**). These merged into 239 lead  
147 loci following analysis with GCTA-COJO (conditional and joint multiple-variant analysis)  
148 (Yang 2012) (**Supplementary Table 1**); 118 of these remained significant when a  
149 conservative/higher (“study-wide”) threshold was used to account for all the different  
150 association routes that were utilised ( $p$ -value  $< 3.2 \times 10^{-10}$  following Bonferroni correction for  
151 153 tests).  
152  
153 A replication study was conducted using OCT scans from 10,409 UK Biobank participants  
154 that were not included in the primary analysis. There was a high level of concordance in the  
155 findings of the two association studies (**Supplementary Fig.4**). A total of 17 loci passed both  
156 the conservative study-wide threshold ( $p$ -value  $< 3.2 \times 10^{-10}$ ) in the primary analysis and the  
157 conventional genome-wide threshold ( $p$ -value  $< 5 \times 10^{-8}$ ) in the replication study. Most of  
158 these loci encompass variants previously linked to retinal layer thickness parameters  
159 (including around *LINC00461*, *TSPAN10* and *COBL* (Gao 2019; Currant 2021; Currant  
160 2023) while a subset of them has also been linked to monogenic retinal disorders (including  
161 *RDH5* [retinal dystrophy], *TYR* [albinism] and *GNB3* [congenital stationary night blindness])  
162 (**Table 2; Supplementary Table 1**).  
163  
164 For each of the 118 lead loci that were found to be significant in the primary analysis ( $p$ -  
165 value  $< 3.2 \times 10^{-10}$ ), we compared the retinal thickness maps of heterozygotes for the key  
166 variant to that of homozygotes. Interestingly, some genetic alterations appeared to have  
167 recessive effects (e.g. rs62075722) while others appeared to have dominant effects (e.g.  
168 rs11051131); topographical variation was also noted (**Supplementary File 1**).  
169  
170 Our primary analysis identified notable associations between multiple embeddings and a  
171 locus encompassing the *MAPT* (microtubule-associated protein tau) gene. The detected  
172 signal appears to be driven by a common ancestral genomic inversion at 17q21.31 (**Fig.3A**)  
173 (Stefansson 2005; Espinosa 2023). Using the pattern of alternative alleles across this  
174 genomic region, we were able to classify 487,409 UK Biobank participants as either  
175 reference:reference (no inversion), reference:inversion (heterozygous inversion) or  
176 inversion:inversion (homozygous inversion) (**Fig.3B**). Similarly to previous studies (Steinberg  
177 2013), we found that the 17q21.31 inversion is common in individuals of European-like  
178 ancestries, rare in individuals of African-like ancestries and very rare in Asian-like  
179 populations (allele frequency of 0.22, 0.01 and 0.004 respectively). When we compared the  
180 retinal thickness profiles between study subjects that carry heterozygous and homozygous

181 inversion genotypes, we found that the 17q21.31 inversion appears to affect retinal thickness  
 182 in an apparently recessive pattern (**Fig.3C**). We then performed a phenome-wide  
 183 association study (PheWAS) of the 17q21.31 inversion using disease-related ICD10 codes.  
 184 After Bonferroni correction, we found six statistically significant signals for ICD10 codes,  
 185 including one for Parkinson disease (G20; p-value =  $5.3 \times 10^{-7}$ ; beta -0.61) (**Fig.3D**).  
 186

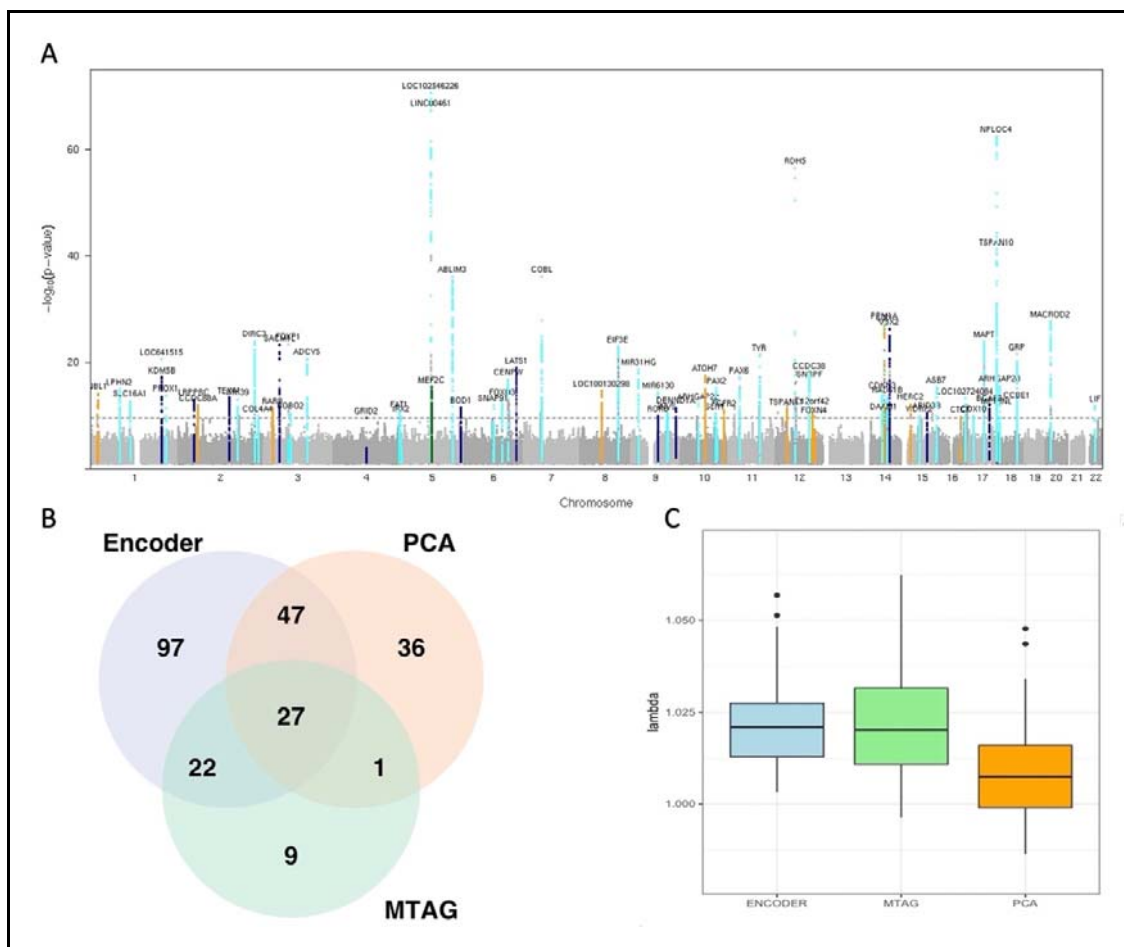

**Figure 2.** Genome-wide association studies of autoencoder-derived retinal OCT phenotypes (primary analysis).

[A] Manhattan plot showing the p-values obtained from common-variant GWAS of embedded features (64 embeddings and first 25 embedding-related principal components). Signals that reached genome-wide significance (p-value  $< 5 \times 10^{-8}$ ) only in embedding variable analyses are highlighted with dark blue. Signals that reached genome-wide significance only in analyses of embedding-related principal components are highlighted with orange. Signals that reach genome-wide significance only in MTAG of embedding variables are highlighted with green. All other genome-wide significant signals are highlighted with cyan.

[B] Venn diagram showing the overlap of lead signals among: conventional GWAS of the 64 embeddings (“encoder” group in light blue); MTAG of the 64 embeddings (“MTAG” group in light green) and conventional GWAS of the first 25 embedding-related principal components (“PCA” group in light orange).

[C] Genomic inflation factor lambda ( $\lambda$ ) for 64 embedding-, 64 MTAG- and 25 PCA-GWAS (median  $\lambda_{GC} = 1.016$ ).

187  
 188  
 189



**Table 1.** Comparative analyses of conventional and MTAG GWAS results (primary analysis)

|                                                          | <b>GWAS<br/>64 embeddings</b> | <b>MTAG<br/>64 embeddings</b> | <b>GWAS<br/>25 PCAs</b> |
|----------------------------------------------------------|-------------------------------|-------------------------------|-------------------------|
| Total genetic variants (p-value < 5 x 10 <sup>-8</sup> ) | 14,885                        | 9,520                         | 11,075                  |
| Lead genetic variants (p-value < 5 x 10 <sup>-8</sup> )  | 443                           | 99                            | 157                     |

GWAS, genome-wide association study; MTAG, multi-trait analysis of GWAS; PCA, principal component analysis.

190

**Table 2.** Summary of the 10 top-ranking loci associated with autoencoder-derived retinal OCT phenotypes

| <b>top-ranking common variant in locus</b> | <b>chr: position (GRCh37)</b> | <b>key gene(s)</b>                                | <b>allele freq (UKB)</b> | <b>minimum p-value</b> | <b>embeddings with significant result for the locus</b> | <b>selected previous association(s) with the detected significant variants in the locus GWAS catalog; (PanelApp)</b>   |
|--------------------------------------------|-------------------------------|---------------------------------------------------|--------------------------|------------------------|---------------------------------------------------------|------------------------------------------------------------------------------------------------------------------------|
| rs17421627                                 | 5:87847586                    | <i>LINC00461</i>                                  | 0.07                     | 4 x 10 <sup>-68</sup>  | 83                                                      | retinal thickness measurements, retinal vascular fractal density                                                       |
| rs62075722                                 | 17:79611271                   | <i>TSPAN10</i><br><i>/NPL0C4</i><br><i>/PDE6G</i> | 0.65                     | 1 x 10 <sup>-62</sup>  | 83                                                      | retinal thickness measurements, refractive error, eye colour, hair colour                                              |
| rs3138142                                  | 12:56115585                   | <i>RDH5</i><br><i>/CD63</i>                       | 0.24                     | 1 x 10 <sup>-56</sup>  | 91                                                      | retinal thickness measurements, refractive error, retinal vascular fractal density; (retinal dystrophy)                |
| rs13171669                                 | 5:148601243                   | <i>AFAP1L1</i><br><i>/ABLIM3</i>                  | 0.43                     | 1 x 10 <sup>-36</sup>  | 84                                                      | retinal thickness measurements, height, waste-hip ratio, lung function                                                 |
| rs12719025                                 | 7:51100190                    | <i>COBL</i>                                       | 0.46                     | 1 x 10 <sup>-36</sup>  | 113                                                     | retinal thickness measurements, refractive error                                                                       |
| rs33912345                                 | 14:60976537                   | <i>SIX6</i><br><i>/C14orf39</i><br><i>/PPPM1A</i> | 0.61                     | 4 x 10 <sup>-28</sup>  | 6                                                       | retinal thickness measurements, glaucoma, height; (ocular malformations)                                               |
| rs887595                                   | 14:74666641                   | <i>VSX2</i><br><i>/LIN52</i>                      | 0.82                     | 6 x 10 <sup>-27</sup>  | 85                                                      | retinal thickness measurements; (microphthalmia)                                                                       |
| rs17279437                                 | 3:45814094                    | <i>SLC6A20</i>                                    | 0.11                     | 8 x 10 <sup>-24</sup>  | 33                                                      | retinal thickness measurements, macular telangiectasia, brain measurements, metabolite measurements; (hyperglycynuria) |
| rs1042602                                  | 11:88911696                   | <i>TYR</i>                                        | 0.37                     | 5 x 10 <sup>-22</sup>  | 29                                                      | retinal thickness measurements, brain measurements, skin colour,                                                       |

|                                                                                                                                                                                                                                                                                                                                                                                                                              |             |              |      |                     |    |                                                                                                                     |
|------------------------------------------------------------------------------------------------------------------------------------------------------------------------------------------------------------------------------------------------------------------------------------------------------------------------------------------------------------------------------------------------------------------------------|-------------|--------------|------|---------------------|----|---------------------------------------------------------------------------------------------------------------------|
|                                                                                                                                                                                                                                                                                                                                                                                                                              |             |              |      |                     |    | hair colour; (albinism)                                                                                             |
| rs62175360                                                                                                                                                                                                                                                                                                                                                                                                                   | 2:218520035 | <i>DIRC3</i> | 0.07 | $9 \times 10^{-22}$ | 21 | retinal thickness measurements, optic disc measurements, brain measurements, metabolite measurements, height cancer |
| <p>The above loci were identified after selecting fine mapped variants that had a p-value <math>&lt; 3.2 \times 10^{-10}</math> in the primary analysis and a p-value <math>&lt; 5 \times 10^{-8}</math> in the replication study. Manual inspection of linkage disequilibrium patterns was subsequently performed to further refine the signals and the 10 loci with the lowest p-value were selected. UKB, UK Biobank.</p> |             |              |      |                     |    |                                                                                                                     |

191

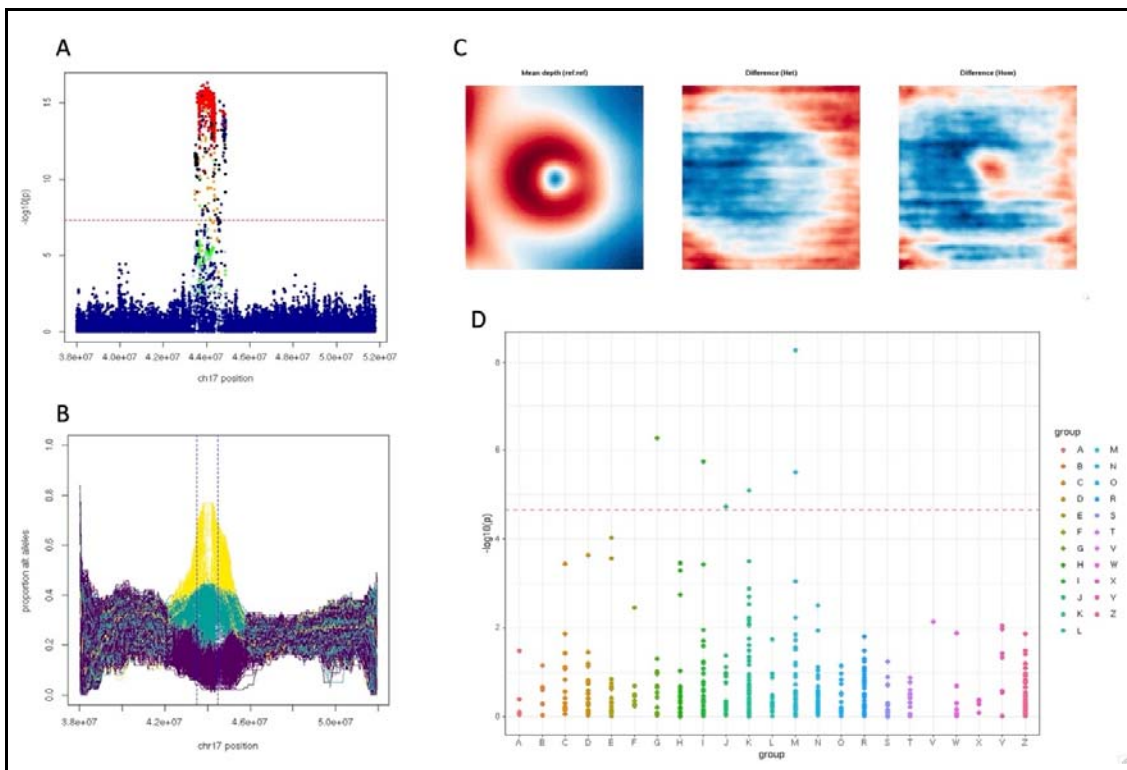

**Figure 3.** Analysis of the chromosome 17q21.31 inversion association signal.

[A] Genetic association study result highlighting a group of 2,936 common variants that passed the genome-wide significance threshold for MTAG of embedding no.21. The genetic alterations are coloured based on their linkage disequilibrium (LD;  $R^2$ ) relationship to the inversion genotype.

[B] Classification of the inversion status based on the pattern of alternative alleles across the 17q21.31 region for 487,409 UK Biobank participants.

[C] Left eye retinal thickness maps showing the difference in retinal structure between individuals with different inversion-related alleles. Left: mean depth (thickness) representation for reference:reference (no inversion) alleles. Middle: difference between image mean for reference:reference and image mean for reference:inversion (heterozygous inversion) genotypes. Right: difference between image mean for reference:reference and image mean for inversion:inversion (homozygous inversion) genotypes. A paracentral area of differential retinal thickness can only be visualised in the reference-to-homozygous difference map (in keeping with a recessive effect).

[D] Phenome-wide associations for the inversion genotype against 454 ICD10 disease codes for which there were >1000 cases in the UK Biobank cohort (when only data obtained after the date of OCT image acquisition were considered); six codes (M16, G20, I84, M20, K60, J84) remained significant after Bonferroni correction; -log<sub>10</sub> p-values are shown grouped by high-level ICD10 category.

192

193

194 **Investigating how autoencoder-derived OCT phenotypes are related between them**  
195 **and with other retinal traits and diseases**

196

197 To gain insights into the nature of the autoencoder-derived embedded features, we  
198 performed correlation and logistic regression analyses. First, we examined the direct  
199 pairwise correlation between the 64 embeddings; a few prominent clusters were noted  
200 (**Fig.4A - upper triangle**). Then we looked at genetic correlation (**Fig.4A - lower triangle**); a  
201 notable observation was the discrepancy between the degree of direct and genetic  
202 correlation for many groups of embeddings. This suggests that although the latent space is  
203 complex and includes (linearly) correlated features, the different embeddings are able to  
204 represent discrete factors related to different aspects of retinal morphology genetics.

205

206 We subsequently investigated the relationship between the 64 embedded features and a set  
207 of traits and disease codes (ICD10) that are available in the UK Biobank dataset.

208 Unsurprisingly, most embeddings correlated with retinal layer thickness parameters  
209 (**Supplementary Fig.5**). We then used a logistic regression approach (with sex, age, height  
210 and weight as covariates) and detected significant associations between specific  
211 embeddings and the following conditions: non-insulin-dependent diabetes, epilepsy,  
212 glaucoma and chronic ischaemic heart disease (**Fig.4B**). Two of these lead signals (epilepsy  
213 and chronic ischaemic heart disease) are associated very specifically to only one embedding  
214 each (embedding no.1 and no.26 respectively). In contrast, glaucoma is associated with two  
215 different embeddings (no.39 and no.47) and diabetes to three sequential embeddings  
216 (no.36-38) (**Fig.4C**). Reassuringly, GWAS analysis of embeddings no.36-38 revealed  
217 statistically significant signals linked to *ADCY5* (**Supplementary Table 1**), a gene that  
218 influences glucose metabolism and has been previously linked to non-insulin-dependent  
219 diabetes by multiple association studies (Roman 2017).

220

221 To understand which aspects of retinal morphology drove the association between the  
222 embedded features and the lead disease codes (non-insulin-dependent diabetes, epilepsy,  
223 glaucoma and chronic ischaemic heart disease) we inspected a set of retinal thickness  
224 difference maps. These compared retinal thickness in UK Biobank participants that had been  
225 assigned the relevant ICD10 code (after OCT imaging) to those that have not (**Fig.4D**). In  
226 keeping with previous observations: (i) the main areas of difference for diabetes were the  
227 paracentral region and the areas temporal to the optic disc (corresponding to the major  
228 retinal vessels) (Li 2021); (ii) the main area of difference for glaucoma corresponded to what  
229 is described in the glaucoma literature as the “macular vulnerability zone” (Hood 2017).

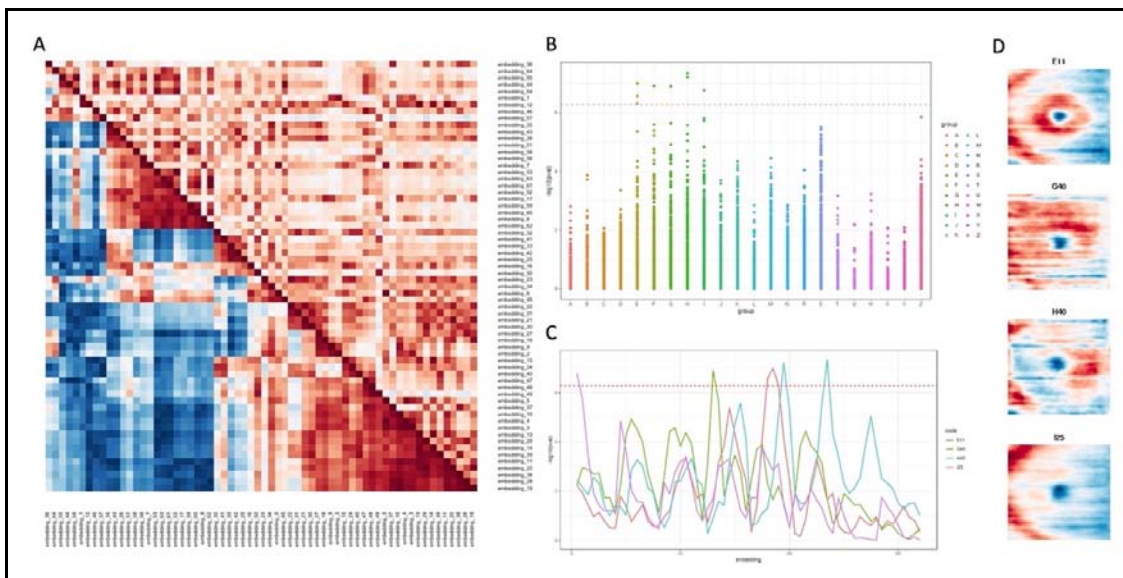

**Figure 4.** Correlation and logistic regression analyses of autoencoder-derived retinal OCT phenotypes. [A] Direct (upper triangle) and genetic (lower triangle) correlations among embedded features (64 embeddings). [B] Logistic regression analysis of the 64 embeddings against high-level ICD10 disease codes; only data obtained after the date of OCT image acquisition were included and only ICD10 codes for which there were >1000 cases in the UK Biobank cohort were considered; sex, age, height and weight were factored in as covariates. A total of 8 signals for 5 distinct ICD10 codes remained significant after Bonferroni correction: E11 (3), G40 (1), H40 (2), I25 (1), F10 (1). [C] Graph showing which specific embeddings were significantly correlated with the lead signals of the logistic regression analysis, *i.e.* non-insulin-dependent diabetes (E11), epilepsy (G40), glaucoma (H40) and chronic ischaemic heart disease (I25);  $-\log_{10}$  p-values are shown for all 64 embedded features. [D] Left eye retinal thickness maps showing the difference in retinal structure between UK Biobank participants who were diagnosed with non-insulin-dependent diabetes (E11; first row), epilepsy (G40; second row), glaucoma (H40; third row) and chronic ischaemic heart disease (I25; fourth row) after having an OCT scan against the groups of individuals that have not been assigned the relevant ICD10 codes.

230

231

### 232 Using autoencoder-derived OCT phenotypes to gain insights into disease risk

233

234 We investigated if autoencoder-derived embedded features from an individual's OCT scan  
235 can help predict the occurrence of certain diseases, including glaucoma and cardiovascular  
236 disorders. We used survival analysis (Cox proportional hazard regression) and found  
237 significant links between specific embeddings and the occurrence of disease (after the OCT  
238 scan date) (**Fig.5A**). High risk cohorts identified based on the embedded features showed a  
239 higher chance of being affected by glaucoma or cardiovascular conditions compared to the  
240 sex-stratified baseline rate of disease occurrence. In other words, the embedded features  
241 could help identify high-risk cohorts (**Fig.5B**). It is highlighted that a few embeddings appear  
242 to be linked to multiple diseases (e.g. no.28), while others have no effect on any disease or  
243 are specific to single disease codes (e.g. embedding no.18 for chronic ischaemic heart  
244 disease). A notable observation is the link between multiple embeddings and essential  
245 hypertension. This is often in the presence of signals from other cardiovascular disease  
246 codes suggesting that changes in blood pressure can lead to alterations in OCT-evaluated

247 retinal structure which may in turn be a marker for the development of cardiovascular  
 248 complications (**Fig.5C**).  
 249

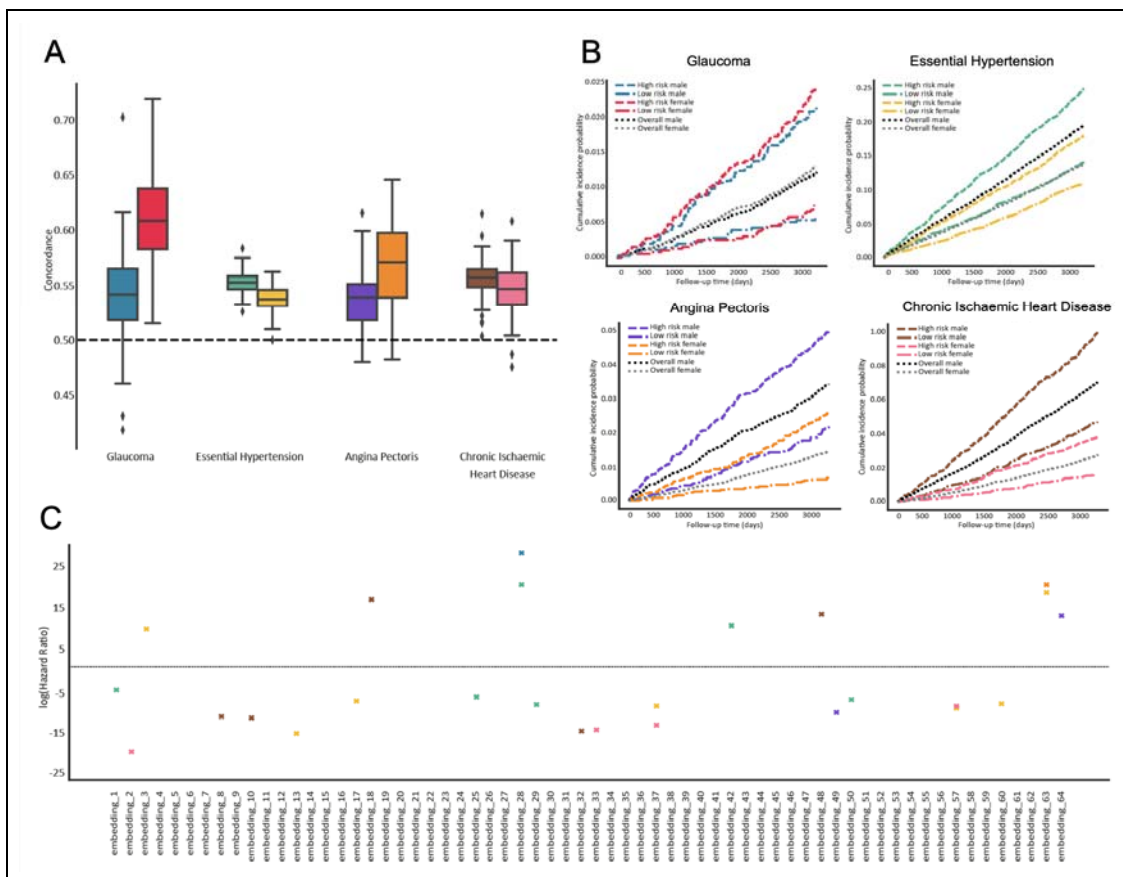

**Figure 5.** Survival analysis investigating the contribution of embedded features upon the time-to-diagnosis for four ICD10 disease codes. [A] Concordance index evaluating the embedding-incorporating model's ability to discriminate sex-stratified disease occurrence; the distribution across 20 repetitions of five-fold cross-validation are shown ( $n = 100$  for each box plot); all box plots demarcate quartiles and median values, while whiskers extend to 1.5x the interquartile range. [B] Kaplan-Meier plots showing sex-stratified risk of disease occurrence for the overall population as well as for high-risk cohorts determined by the embedding-incorporating model (top 25% based on Cox regression). [C] Graph highlighting which embedded features have a significant relationship with the selected diseases in male and female cohorts;  $-\log_{10}$  hazard ratios are shown.

250  
 251  
 252  
 253  
 254



## 255 DISCUSSION

256

257 Phenotypes are abstract entities that can be thought of as simplified maps carved from  
258 higher dimension spaces (Cortese 2021). These maps are generally influenced by a  
259 combination of genetic, environmental and stochastic factors. Discovering phenotypes that  
260 represent distinct biological pathways and/or have pragmatic medical significance is of  
261 particular interest (Dahl & Zaitlen 2020). Here, we show that a computational, autoencoder-  
262 based approach can be used to efficiently extract informative phenotypes from retinal OCT  
263 images.

264

265 Analysis of the genetic basis of autoencoder-derived embedded features revealed 118  
266 statistically significant ( $p$ -value  $< 3.2 \times 10^{-10}$ ) association signals. Notably, three recent  
267 studies that used a similar analytical approach but focused on different imaging modalities —  
268 fundus photography (Kirchler 2022; Xie 2023) and cardiac magnetic resonance images  
269 (Bonazzola 2023) — identified a slightly smaller number of genetic associations  
270 (Supplementary Table 2). Whilst most of the loci detected here have prior links to retinal  
271 phenotypes, a subset of them have no such prior associations. One example is the locus  
272 around *LPHN2/ADGRL2*, a gene encoding a synaptic adhesion molecule implicated in  
273 guiding neural circuit connectivity (Donahue 2021) (lead marker: rs1492258; association with  
274 7 autoencoder-derived embedded features; minimum  $p$ -value  $1.4 \times 10^{-15}$ ). Although this gene  
275 is expressed in the retina, especially in the bipolar cells (Karlsson 2021), it has not been  
276 previously associated with a retinal phenotype.

277

278 Reassuringly, there was a significant overlap between the findings of the present study and  
279 the results of previous analyses that investigated the genetic architecture of traditional OCT-  
280 derived retinal phenotypes. These include three UK Biobank studies: (i) one that looked at  
281 macular (*i.e* total central retinal) thickness and reported 139 loci (Gao 2019), and (ii) two  
282 from our group that investigated OCT-derived measurements of inner and outer retinal  
283 layers, and reported 46 and 111 loci respectively (Currant 2021; Currant 2023). Overall, 36%  
284 (98/273) of the combined lead loci from these studies also reached genome-wide  
285 significance in the present analysis (58%, 33% and 41% for Currant 2021, Currant 2023 and  
286 Gao 2019 respectively). Interestingly, the two signals with the highest statistical significance  
287 in the macular thickness GWAS conducted by Gao and colleagues (Gao 2019) were also the  
288 most significant hits in this study (**Fig.2**). The marker with the highest statistical significance  
289 was within the *LINC00461* locus. *LINC00461* is a long noncoding RNA that is the primary  
290 transcript of miR-9-2. *LINC00461* is highly expressed in neural stem cells and a decrease in  
291 its expression has been shown to alter the timing of retinal neurogenesis (Thomas 2022).  
292 The locus with the second highest statistical significance encompassed the *TSPAN10* gene.

293 In the eye, *TSPAN10* is predominantly expressed in melanin-containing cells (retinal pigment  
294 epithelia [RPE] and uveal melanocytes), and the corresponding protein is thought to have a  
295 role in regulating retinal cell fate and development (Dornier 2012; Haining 2012; Orozco  
296 2020). Further functional genomic analyses of these two key loci are expected to provide  
297 important insights into developmental processes shaping human retinal morphology.

298  
299 An intriguing association that we detected was that between certain autoencoder-derived  
300 retinal phenotypes and a common 17q21.31 inversion encompassing the *MAPT* gene.  
301 *MAPT* is primarily expressed in brain neurons, and genetic alterations impacting the *MAPT*  
302 locus have been linked to several neurodegenerative disorders including Alzheimer disease,  
303 frontotemporal dementia and parkinsonism (Wang 2016; Shi 2021). Recently, inner retinal  
304 layer thickness parameters and glaucoma have been added to the growing list of  
305 phenotypes associated with the *MAPT* locus (Gharahkhani 2021; Diaz-Torres 2023). Further  
306 work is required to pinpoint which (and how many) genes within the *MAPT* region are  
307 causally associated with retinal and brain phenotypes (Diaz-Torres 2023). More broadly, the  
308 extent to which the overlap between neurodegenerative disorders, retinal morphology and  
309 glaucoma reflects pleiotropy rather than causal relationships remains to be determined. Of  
310 note, causal genetic effects in both directions have been previously suggested between  
311 retinal imaging traits and Alzheimer disease (Zhao 2023) while little support has been found  
312 for a causal relationship between glaucoma and Alzheimer disease (Budu-Aggrey 2020).

313  
314 Deep learning approaches have been shown to be able to detect imaging patterns that are  
315 not amenable to human identification and which can assist with prediction tasks  
316 (Radhakrishnan 2023). For example, neural networks can predict sex and age with good  
317 accuracy from retinal OCT images (Chueh 2022; Le Goallec 2022) whereas human experts  
318 find these tasks impossible. Here, we investigated if autoencoders can identify OCT  
319 parameters that can be used to predict health outcomes (glaucoma and cardiovascular  
320 disease). Although the overall predictive ability of the generated models was moderate, the  
321 autoencoder-derived features were shown to enhance risk stratification. These observations  
322 suggest that it is not inconceivable that purpose-built autoencoders will play a role in  
323 improving the efficiency of medical screening programs in the future.

324  
325 This study has a number of limitations. First, the autoencoder input was retinal thickness  
326 maps generated using a U-Net approach which made our framework semi-automated (as a  
327 small amount of manual labelling was required). Using three-dimensional autoencoders to  
328 extract features directly from OCT volume scans could fully automate the pipeline,  
329 minimising any subjective aspects and reducing the burden of data curation (Diaz-Pinto  
330 2022). Second, we only performed common-variant genetic association analyses of the

331 obtained embedded features. The increasing availability of genome sequencing data in UK  
332 Biobank participants will allow us to more comprehensively look for genetic associations,  
333 including with rare variants and with copy number alterations in the future. Third, the fact that  
334 relationships were detected between embeddings and certain health outcomes does not  
335 necessarily imply causation. The main aim of this study was to assess if autoencoders can  
336 be utilised to produce biologically and clinically relevant phenotypes. In-depth confounder  
337 adjustment and causal inference studies were therefore not performed. Furthermore, the  
338 predictive models described here have a proof-of-concept nature and are not intended for  
339 implementation (especially as the data used for training and evaluation were highly  
340 homogeneous).

341  
342 In summary, this study proposes a framework for retinal phenotyping based on a self-  
343 supervised deep learning approach. Our findings highlight that autoencoder-based  
344 techniques can be used to extract knowledge about the genetic factors determining retinal  
345 morphology. The outlined approach is flexible and can be adapted and extended to other  
346 organs and imaging modalities.



## 347 **ONLINE METHODS**

348

### 349 **Cohort characteristics**

350

351 The UK Biobank is a biomedical resource containing in-depth genetic and health information from  
352 >500,000 individuals from across the UK. Participants were recruited between 2006 and 2010 and, at  
353 enrolment, were between 40 and 69 years of age. At the initial assessment, UK Biobank volunteers  
354 provided consent, answered questions on socio-demographic, lifestyle and health-related factors,  
355 completed a range of physical measures, and provided biological samples. DNA was extracted from  
356 the donated blood samples and was used to generate genotyping array data. The baseline  
357 information has been extended in several ways. For example, repeat assessments were conducted in  
358 subsets of the cohort every few years (Bycroft 2018). Notably, thousands of UK Biobank participants  
359 underwent ophthalmic phenotyping including imaging of the central retina using OCT (>84,000  
360 individuals) (Patel 2016; Chua 2019). A total of 67,664 individuals were imaged at the time of their  
361 baseline visit (Instance 0, "Initial assessment visit (2006-2010)"); this cohort was the focus of the  
362 primary analysis. A further 17,090 different participants were imaged for the first time during their first  
363 repeat assessment (Instance 1, "First repeat assessment visit (2012-13)"); these were included in the  
364 replication study.

365

366 We performed quality control considering genetic and imaging parameters. First, to reduce the impact  
367 of population stratification and to increase the validity of the conducted genetic association studies,  
368 we focused on individuals within a genetically well-mixed, European-like subset of the UK Biobank.  
369 This was achieved by applying PCA to UK Biobank genotypic data using standard, previously-  
370 implemented methods (Currant 2023). Additional participants were excluded as their OCT scans  
371 failed to meet a set of previously-described, rigorous quality control criteria (Patel 2016; Currant 2021;  
372 Currant 2023). Finally, participants were removed on the basis of being recommended for exclusion  
373 from genetic studies by the UK Biobank or because they were related to third degree or more. The  
374 final dataset for the primary analysis included 31,135 study subjects (**Supplementary Fig.1**). Similar  
375 criteria were used for the replication study with the exception of the imaging quality control parameters  
376 which were identical to those described by Zekavat and colleagues (Zekavat 2023).

377

378

### 379 **Generation of thickness maps from OCT volume scans**

380

381 All the UK Biobank volunteers that were analysed as part of this study were imaged using the 3D  
382 OCT-1000 Mark II device (Topcon, Japan). OCT imaging was carried out in a dark room without pupil  
383 dilation using the 3D 6x6 mm<sup>2</sup> macular volume scan mode (128 horizontal B-scans in a 6x6 mm raster  
384 pattern). The right eye was imaged first (Patel 2016; Chua 2019). Our analysis focused on left eye  
385 images as we assumed that familiarity with the test would have led to scans that, on average, had  
386 higher overall quality. A total of 128 PNG images were generated from each tested eye with the  
387 dimensions of each PNG image being 650 x 512 x 1 grayscale pixels. After cropping the top (superior)  
388 and bottom (inferior) edge of the image area, PNG images with dimensions of 512 x 512 x 1 pixels  
389 were obtained.

390

391 The 128 images of each OCT scan were used to create a “thickness map”, *i.e.* a single image  
392 displaying the retinal thickness throughout the imaged area. To achieve this, segmentation of all the  
393 scans in the dataset was performed using a U-Net based approach. The utilised U-Net method was  
394 first described in 2015 (Ronneberger 2015) and involves a fully convolutional network that consists of  
395 a contracting path (that extracts features) and an expansive path (that localises objects).

396

397 Initially, the inner- and outer-most limits of the retina (corresponding to the inner limiting membrane  
398 and the Bruch’s membrane respectively) were manually identified in 100 randomly-selected OCT  
399 images using the <https://www.makesense.ai> tool. The original images and the generated “ground  
400 truth” segmentation masks were subsequently utilised to train the U-Net. Adaptive Moment Estimation  
401 (Adam) was used to optimize the algorithm for training the network parameters and training was  
402 performed for 50 epochs. The output of the U-Net consisted of segmented OCT images (analogous to  
403 the provided masks). These were used to calculate retinal thickness (*i.e.* the vertical distance between  
404 the top and bottom edge of the mask in each of the 512 points of the horizontal axis). The obtained  
405 measurements were compared to those acquired through the purpose-built Topcon Advanced  
406 Boundary Segmentation (TABS) software (the latter are available in the UK Biobank dataset). Good  
407 correlation was observed in retinae both with and without pathology, increasing confidence in the  
408 utilised approach (**Supplementary Fig.6**). Finally, the thickness measurements from the 128 images  
409 (‘slices’) that were obtained in each tested left eye were combined and used to generate a thickness  
410 map for each UK Biobank participant that met the inclusion criteria of this study (**Fig.1**).

411

412

### 413 **Autoencoder set-up**

414

415 An autoencoder was used for self-supervised feature extraction from the 31,135 left eye OCT-derived  
416 thickness maps. A conventional autoencoder architecture was utilised (Hinton 2006; Michelucci 2022):  
417 the encoder network projected the input images to a low-dimensional space (‘latent space’) with 64  
418 variables (‘embeddings’), and a function was used to try to reconstruct the original images from these  
419 64 latent space representations. A Mean Squared Error (MSE) loss function was employed to  
420 measure the deviation between reconstructed and input data (but otherwise the reconstructed images  
421 were not used in the primary analysis). It is noted that the autoencoder was trained end-to-end for 150  
422 epochs utilising 2500 training and 500 test images. We trialled different autoencoder layouts with  
423 bottleneck layers of the following sizes: 128, 64, 32 and 16. For 128 and 64, we obtained very similar  
424 reconstruction loss curves during training over 300 epochs. In contrast, for both 32 and 16 the image  
425 reconstruction loss could not be dropped below 0.006 suggesting that these models were unable to  
426 generalise as well as the larger bottleneck sizes. We then selected a bottleneck size of 64 since this  
427 was the smallest size with the best image reconstruction accuracy among the layouts that we tested.

428

429 To extract further information from the latent space, PCA (*i.e.* linear dimensionality reduction) was  
430 performed using the 64 embeddings as input; the first 25 principal components were then considered  
431 for further analyses.

432

433

#### 434 **Genome-wide association studies: primary analysis**

435

436 GWAS analyses of autoencoder-derived embedded features (64 embeddings and 25 embedding-  
437 related principal components) were performed using an additive linear model implemented in  
438 REGENIE v3.1.1 (<https://rqcg.github.io/regenie/>) (Mbatchou 2021). All embedded variables were  
439 inverse rank normalised prior to modelling with REGENIE to avoid any potential bias that could be  
440 introduced by outlier values. The following quality-control filters were applied on the imputed genotype  
441 data (UK Biobank data-field 22828) during the creation of the whole-genome regression model  
442 (REGENIE step 1): a minor allele frequency (MAF)  $\geq 5\%$ ; Hardy–Weinberg equilibrium test not  
443 exceeding  $P > 1 \times 10^{-15}$ ; a genotyping rate above 99%; not present in a low-complexity region, a  
444 region of long-range linkage disequilibrium or a sex chromosome (Mbatchou 2021). This resulted in  
445 up to 7,114,193 genotyped variants that were tested for association using a Firth logistic regression  
446 model (REGENIE step 2). Correction for the following covariates was undertaken: age at recruitment  
447 (data-field 21022), sex (data-field 31), height (data-field 50), weight (data-field 21002), refractive error  
448 (calculated as spherical error + 0.5 × cylindrical error; data-fields 5085 and 5086) and genetic  
449 principal components 1 to 20 (data-field 22009). Two levels of statistical significance were used: the  
450 conventional genome-wide significance (p-value  $< 5 \times 10^{-8}$ ) and a conservative, “study-wide”  
451 threshold (p-value  $< 3.2 \times 10^{-10}$  following Bonferroni correction for 153 tests).

452

453 A degree of correlation was expected among autoencoder-derived embeddings and the summary  
454 statistics obtained from the GWAS analyses were used to perform a multi-trait meta-analysis. First,  
455 embeddings with a high genetic correlation (*i.e.* with Pearson correlation coefficient  $R > 0.9$ ) were  
456 identified. Then, the MTAG v1.0.8 tool (<https://github.com/JonJala/mtag>) (Turley 2018) was used to  
457 conduct a single meta-analysis for every individual inverse rank normalised embedding, leveraging  
458 the findings from correlated embedded features and producing an updated set of GWAS summary  
459 statistics for each of these 64 variables. Under certain assumptions, the generated estimates will be  
460 more precise than those obtained from the input GWAS (Turley 2018).

461

462 To refine the obtained association signals, further analyses were performed using the GCTA-COJO  
463 tool (<https://yanglab.westlake.edu.cn/software/gcta/#COJO>) (Yang 2010). These analyses were  
464 conducted utilising linkage disequilibrium estimates from a reference sample (Currant 2023) and  
465 summary statistics from: (i) the 64 embedding GWAS, (ii) the 25 embedding-related principal  
466 component GWAS, (iii) the 64 embedding MTAG-GWAS. Genetic variants in loci that were on  
467 different chromosomes or more than 10 Mb distant from each other were assumed to be uncorrelated.

468

469 Genetic changes in the main variant set were annotated using Ensembl (Cunningham 2022), Open  
470 Targets (Ochoa 2021) and GWAS Catalog (Sollis 2023) data. To accurately summarise the strongest  
471 signals (presented in **Table 2**), the linkage disequilibrium metrics of the changes that were highlighted  
472 as lead variants by GCTA-COJO analysis and were within 1 Mb of one another were manually  
473 inspected using the LDlink tool (Myers 2020).

474

475

476 **Genome-wide association studies: replication**

477

478 We sought to replicate the genetic associations detected in the primary analysis in a different set of  
479 OCT images. As the number of open resources that have sufficiently large human cohorts with  
480 combined genomic and OCT imaging data is very small, we made use of the UK Biobank “Instance 1”  
481 left eye scans (data-field: 21017\_1\_0). This included images from 17,090 participants that were not  
482 part of the discovery/primary cohort and were not used for training either the U-net segmentation or  
483 the autoencoder. It is noted that these additional OCT images were obtained at a different time (2012-  
484 13) compared to the scans in the discovery/primary cohort (2006-2010). Due to the inconsistent  
485 capture of certain OCT-related metrics in the replication cohort scans, we used a different set of  
486 image QC exclusion criteria. Following the removal of poor quality and outlier images (using the  
487 approach described in Zekavat 2023), the replication cohort included 10,439 high quality scans from  
488 unrelated UK Biobank participants of predominantly European-like genetic ancestries (as determined  
489 by PCA of genotypes). A replication GWAS was then performed using exactly the same parameters  
490 as in the discovery/primary study (outlined above). To gain insights into the extent to which the  
491 findings of the primary and the replication study were in agreement, we assessed the degree of  
492 correlation between the detected effect size estimates; the relevant beta-beta plots are shown in  
493 **Supplementary Fig.4.**

494

495

496 **Correlation and logistic regression analyses**

497

498 Direct pairwise comparisons between the 64 embeddings were performed and the relevant Pearson  
499 correlation coefficients (R) were calculated. Genetic correlation was also estimated, again using  
500 Pearson correlation coefficients but this time utilising the effect size estimates from across the  
501 significant associations for all 64 embeddings. The two correlation matrices that were generated were  
502 then displayed using a heatmap where rows and columns were ordered by the distances obtained via  
503 hierarchical clustering (on the embedding value correlation matrix only) (**Fig.4**).

504

505 In addition to evaluating the relationship between pairs of the studied embedded features, correlation  
506 analyses were performed to look for links between each of these 64 features and four ophthalmic  
507 traits (**Supplementary Fig.3**). Furthermore, a logistic regression approach was used to look for  
508 relationships between embeddings and a set of diseases (high-level ICD10 codes); only the 454  
509 disease-related codes for which there were >1000 cases in the UK Biobank cohort were considered  
510 (when factoring in only data obtained after the date of OCT image acquisition (2012)). Age, sex,  
511 height and weight were used as covariates and the statistical significance threshold was determined  
512 using Bonferroni correction.

513

514

515 **Predictive modelling**

516

517 Survival analysis was performed using penalized Cox proportional hazard regression; a mixture of L1  
518 and L2 regularisation was utilised (often referred to as the Cox elastic net). We focused on two main

519 outcomes – glaucoma and cardiovascular disorders (essential hypertension, angina pectoris and  
520 chronic ischaemic heart disease). These included ICD10 codes that were highlighted as significant by  
521 the logistic regression analyses described in the previous section, and were chosen as predicting  
522 them was deemed to be of clinical significance. Only diagnoses assigned after the date of OCT image  
523 acquisition were considered. To evaluate discriminative performance, we used Harrell's C-index as a  
524 measure of the concordance between predicted and actual risk. The hyperparameter of L1/L2  
525 penalization strength was set to 0.1 and 20 repetitions of five-fold cross-validation were used to  
526 evaluate model performance. Survival curves were estimated using the Kaplan-Meier estimator.

527  
528

### 529 **Ethics approval**

530

531 The UK Biobank has received approval from the National Information Governance Board for Health  
532 and Social Care and the National Health Service North West Centre for Research Ethics Committee  
533 (Ref: 11/NW/0382). This research was conducted using the UK Biobank Resource under projects  
534 49978, 53144 and 2112. All investigations were conducted in accordance with the tenets of the  
535 Declaration of Helsinki.

536

### 537 **DATA AVAILABILITY**

538 UK Biobank data are available under restricted access through a procedure described at  
539 <http://www.ukbiobank.ac.uk/using-the-resource/>. All other data supporting the findings of this  
540 study are available within the article (including its supplementary information files).

541

### 542 **CODE AVAILABILITY**

543

544 The scripts used to analyse the datasets included in this study are available at  
545 <https://github.com/tf2/autoencoder-oct>.

546

547

548

## 549 REFERENCES

- 550 • Bonazzola R, Ferrante E, Ravikumar N, Xia Y, Keavney B, Plein S, Syeda-Mahmood T, Frangi  
551 AF. Unsupervised ensemble-based phenotyping helps enhance the discoverability of genes  
552 related to heart morphology. arXiv 2023. doi: 10.48550/arXiv.2301.02916.  
553
- 554 • Bouma BE, de Boer JF, Huang D, Jang IK, Yonetsu T, Leggett CL, Leitgeb R, Sampson DD,  
555 Suter M, Vakoc B, Villiger M, Wojtkowski M. Optical coherence tomography. *Nat Rev Methods*  
556 *Primers*. 2022;2:79. doi: 10.1038/s43586-022-00162-2.  
557
- 558 • Bulik-Sullivan BK, Loh PR, Finucane HK, Ripke S, Yang J; Schizophrenia Working Group of the  
559 Psychiatric Genomics Consortium; Patterson N, Daly MJ, Price AL, Neale BM. LD Score  
560 regression distinguishes confounding from polygenicity in genome-wide association studies. *Nat*  
561 *Genet*. 2015;47(3):291-5. doi: 10.1038/ng.3211.  
562
- 563 • Budu-Aggrey A, Hysi P, Kehoe PG, Igo RP, Wiggs JL, Cooke Bailey J, Haines J, Pasquale LR,  
564 MacGregor S, NEIGHBORHOOD consortium, International Glaucoma Genetics Consortium, UK  
565 Biobank, Davey Smith G, Davies NM, Atan D. The relationship between open angle glaucoma,  
566 optic disc morphology and Alzheimer's Disease: a Mendelian randomization study. *bioRxiv*. 2020.  
567 doi: 10.1101/2020.08.30.20184846.  
568
- 569 • Bycroft C, Freeman C, Petkova D, Band G, Elliott LT, Sharp K, Motyer A, Vukcevic D, Delaneau  
570 O, O'Connell J, Cortes A, Welsh S, Young A, Effingham M, McVean G, Leslie S, Allen N,  
571 Donnelly P, Marchini J. The UK Biobank resource with deep phenotyping and genomic data.  
572 *Nature*. 2018;562(7726):203-209. doi: 10.1038/s41586-018-0579-z.  
573
- 574 • Chua SYL, Thomas D, Allen N, Lotery A, Desai P, Patel P, Muthy Z, Sudlow C, Peto T, Khaw PT,  
575 Foster PJ; UK Biobank Eye & Vision Consortium. Cohort profile: design and methods in the eye  
576 and vision consortium of UK Biobank. *BMJ Open*. 2019;9(2):e025077. doi: 10.1136/bmjopen-  
577 2018-025077.  
578
- 579 • Cortese A, Yamamoto A, Hashemzadeh M, Sepulveda P, Kawato M, De Martino B. Value signals  
580 guide abstraction during learning. *Elife*. 2021;10:e68943. doi: 10.7554/eLife.68943.  
581
- 582 • Cunningham F, Allen JE, Allen J, Alvarez-Jarreta J, Amode MR, Armean IM, Austine-Orimoloye  
583 O, Azov AG, Barnes I, Bennett R, Berry A, Bhai J, Bignell A, Billis K, Boddu S, Brooks L,  
584 Charkhchi M, Cummins C, Da Rin Fioretto L, Davidson C, Dodiya K, Donaldson S, El Houdaigui  
585 B, El Naboulsi T, Fatima R, Giron CG, Genev T, Martinez JG, Guizarro-Clarke C, Gymer A, Hardy  
586 M, Hollis Z, Hourlier T, Hunt T, Juettemann T, Kaikala V, Kay M, Lavidas I, Le T, Lemos D,  
587 Marugán JC, Mohanan S, Mushtaq A, Naven M, Ogeh DN, Parker A, Parton A, Perry M, Piližota I,  
588 Prosovetskaia I, Sakthivel MP, Salam AIA, Schmitt BM, Schuilenburg H, Sheppard D, Pérez-Silva  
589 JG, Stark W, Steed E, Sutinen K, Sukumaran R, Sumathipala D, Suner MM, Szpak M, Thormann  
590 A, Tricomi FF, Urbina-Gómez D, Veidenberg A, Walsh TA, Walts B, Willhoft N, Winterbottom A,  
591 Wass E, Chakiachvili M, Flint B, Frankish A, Giorgetti S, Haggerty L, Hunt SE, Ilesley GR,  
592 Loveland JE, Martin FJ, Moore B, Mudge JM, Muffato M, Perry E, Ruffier M, Tate J, Thybert D,  
593 Trevanion SJ, Dyer S, Harrison PW, Howe KL, Yates AD, Zerbino DR, Flicek P. Ensembl 2022.  
594 *Nucleic Acids Res*. 2022;50(D1):D988-D995. doi: 10.1093/nar/gkab1049  
595
- 596 • Currant H, Hysi P, Fitzgerald TW, Gharahkhani P, Bonnemaier PWM, Senabouth A, Hewitt AW;  
597 UK Biobank Eye and Vision Consortium; International Glaucoma Genetics Consortium; Atan D,  
598 Aung T, Charng J, Choquet H, Craig J, Khaw PT, Klaver CCW, Kubo M, Ong JS, Pasquale LR,  
599 Reisman CA, Daniszewski M, Powell JE, Pébay A, Simcoe MJ, Thiadens AAHJ, van Duijn CM,  
600 Yazar S, Jorgenson E, MacGregor S, Hammond CJ, Mackey DA, Wiggs JL, Foster PJ, Patel PJ,  
601 Birney E, Khawaja AP. Genetic variation affects morphological retinal phenotypes extracted from  
602 UK Biobank optical coherence tomography images. *PLoS Genet*. 2021;17(5):e1009497. doi:  
603 10.1371/journal.pgen.1009497.  
604



- 605 • Currant H, Fitzgerald TW, Patel PJ, Khawaja AP; UK Biobank Eye and Vision Consortium;  
606 Webster AR, Mahroo OA, Birney E. Sub-cellular level resolution of common genetic variation in  
607 the photoreceptor layer identifies continuum between rare disease and common variation. *PLoS*  
608 *Genet.* 2023;19(2):e1010587. doi: 10.1371/journal.pgen.1010587.  
609
- 610 • Chueh KM, Hsieh YT, Chen HH, Ma IH, Huang SL. Identification of sex and age from macular  
611 optical coherence tomography and feature analysis using deep learning. *Am J Ophthalmol.*  
612 2022;235:221-228. doi: 10.1016/j.ajo.2021.09.015.  
613
- 614 • Dahl A, Zaitlen N. Genetic influences on disease subtypes. *Annu Rev Genomics Hum Genet.*  
615 2020;21:413-435. doi: 10.1146/annurev-genom-120319-095026.  
616
- 617 • De Fauw J, Ledsam JR, Romera-Paredes B, Nikolov S, Tomasev N, Blackwell S, Askham H,  
618 Glorot X, O'Donoghue B, Visentin D, van den Driessche G, Lakshminarayanan B, Meyer C,  
619 Mackinder F, Bouton S, Ayoub K, Chopra R, King D, Karthikesalingam A, Hughes CO, Raine R,  
620 Hughes J, Sim DA, Egan C, Tufail A, Montgomery H, Hassabis D, Rees G, Back T, Khaw PT,  
621 Suleyman M, Cornebise J, Keane PA, Ronneberger O. Clinically applicable deep learning for  
622 diagnosis and referral in retinal disease. *Nat Med.* 2018;24(9):1342-1350. doi: 10.1038/s41591-  
623 018-0107-6.  
624
- 625 • Diaz-Pinto A, Ravikumar N, Attar R, Suinesiaputra A, Zhao Y, Levelt E, Dall'Armellina E, Lorenzi  
626 M, Chen Q, Keenan TDL, Agron E, Chew EY, Lu Z, Gale CP, Gale RP, Plein S, Frangi AF.  
627 Predicting myocardial infarction through retinal scans and minimal personal information. *Nat Mach*  
628 *Intell* 2022;4:55–61. doi: 10.1038/s42256-021-00427-7.  
629
- 630 • Diaz-Torres S, He W, Thorp J, Seddighi S, Mullany S; IGGC International Glaucoma Genetics  
631 Consortium; Hammond CJ, Hysi PG, Pasquale LR, Khawaja AP, Hewitt AW, Craig JE, Mackey  
632 DA, Wiggs JL, van Duijn C, Lupton MK, Ong JS, MacGregor S, Gharahkhani P. Disentangling the  
633 genetic overlap and causal relationships between primary open-angle glaucoma, brain  
634 morphology and four major neurodegenerative disorders. *EBioMedicine.* 2023;92:104615. doi:  
635 10.1016/j.ebiom.2023.104615.  
636
- 637 • Donohue JD, Amidon RF, Murphy TR, Wong AJ, Liu ED, Saab L, King AJ, Pae H, Ajayi MT,  
638 Anderson GR. [Parahippocampal latrophilin-2 \(ADGRL2\) expression controls topographical](#)  
639 [presubiculum to entorhinal cortex circuit connectivity.](#) *Cell Rep.* 2021;37(8):110031. doi:  
640 10.1016/j.celrep.2021.110031.  
641
- 642 • Dornier E, Coumailleau F, Ottavi JF, Moretti J, Boucheix C, Mauduit P, Schweisguth F, Rubinstein  
643 E. TspanC8 tetraspanins regulate ADAM10/Kuzbanian trafficking and promote Notch activation in  
644 flies and mammals. *J Cell Biol.* 2012;199(3):481-96. doi: 10.1083/jcb.201201133.  
645
- 646 • Elliott LT, Sharp K, Alfaro-Almagro F, Shi S, Miller KL, Douaud G, Marchini J, Smith SM.  
647 Genome-wide association studies of brain imaging phenotypes in UK Biobank. *Nature.*  
648 2018;562(7726):210-216. doi: 10.1038/s41586-018-0571-7.  
649
- 650 • Espinosa I, Alfonso-Sánchez MA, Gómez-Pérez L, Peña JA. Neolithic expansion and the  
651 17q21.31 inversion in Iberia: an evolutionary approach to H2 haplotype distribution in the Near  
652 East and Europe. *Mol Genet Genomics.* 2023;298(1):153-160. doi: 10.1007/s00438-022-01969-0.  
653
- 654 • Gao XR, Huang H, Kim H. Genome-wide association analyses identify 139 loci associated with  
655 macular thickness in the UK Biobank cohort. *Hum Mol Genet.* 2019;28(7):1162-1172. doi:  
656 10.1093/hmg/ddy422.  
657
- 658 • Gharahkhani P, Jorgenson E, Hysi P, Khawaja AP, Pendergrass S, Han X, Ong JS, Hewitt AW,  
659 Segrè AV, Rouhana JM, Hamel AR, Igo RP Jr, Choquet H, Qassim A, Josyula NS, Cooke Bailey  
660 JN, Bonnemaier PWM, Iglesias A, Siggs OM, Young TL, Vitart V, Thiadens AAHJ, Karjalainen J,  
661 Uebe S, Melles RB, Nair KS, Luben R, Simcoe M, Amersinghe N, Cree AJ, Hohn R, Poplawski A,

- 662 Chen LJ, Rong SS, Aung T, Vithana EN; NEIGHBORHOOD consortium; ANZRAG consortium;  
663 Biobank Japan project; FinnGen study; UK Biobank Eye and Vision Consortium; GIGA study  
664 group; 23 and Me Research Team; Tamiya G, Shiga Y, Yamamoto M, Nakazawa T, Currant H,  
665 Birney E, Wang X, Auton A, Lupton MK, Martin NG, Ashaye A, Olawoye O, Williams SE, Akafo S,  
666 Ramsay M, Hashimoto K, Kamatani Y, Akiyama M, Momozawa Y, Foster PJ, Khaw PT, Morgan  
667 JE, Strouthidis NG, Kraft P, Kang JH, Pang CP, Pasutto F, Mitchell P, Lotery AJ, Palotie A, van  
668 Duijn C, Haines JL, Hammond C, Pasquale LR, Klaver CCW, Hauser M, Khor CC, Mackey DA,  
669 Kubo M, Cheng CY, Craig JE, MacGregor S, Wiggs JL. Genome-wide meta-analysis identifies  
670 127 open-angle glaucoma loci with consistent effect across ancestries. *Nat Commun*.  
671 2021;12(1):1258. doi: 10.1038/s41467-020-20851-4.  
672
- 673 • Gong W, Bai S, Zheng YQ, Smith SM, Beckmann CF. Supervised phenotype discovery from  
674 multimodal brain imaging. *IEEE Trans Med Imaging*. 2022;PP. doi: 10.1109/TMI.2022.3218720.  
675
  - 676 • Haining EJ, Yang J, Bailey RL, Khan K, Collier R, Tsai S, Watson SP, Frampton J, Garcia P,  
677 Tomlinson MG. The TspanC8 subgroup of tetraspanins interacts with A disintegrin and  
678 metalloprotease 10 (ADAM10) and regulates its maturation and cell surface expression. *J Biol*  
679 *Chem*. 2012;287(47):39753-65. doi: 10.1074/jbc.M112.416503.  
680
  - 681 • Hasson U, Nastase SA, Goldstein A. Direct Fit to Nature: An evolutionary perspective on  
682 biological and artificial neural networks. *Neuron*. 2020;105(3):416-434. doi:  
683 10.1016/j.neuron.2019.12.002.  
684
  - 685 • Hinton GE, Salakhutdinov RR. Reducing the dimensionality of data with neural networks.  
686 *Science*. 2006;313(5786):504-7. doi: 10.1126/science.1127647.  
687
  - 688 • Hinton G. Deep learning- A technology with the potential to transform health care. *JAMA*.  
689 2018;320(11):1101-1102. doi: 10.1001/jama.2018.11100.  
690
  - 691 • Hood DC. Improving our understanding, and detection, of glaucomatous damage: An approach  
692 based upon optical coherence tomography (OCT). *Prog Retin Eye Res*. 2017;57:46-75. doi:  
693 10.1016/j.preteyeres.2016.12.002.  
694
  - 695 • Karlsson M, Zhang C, Méar L, Zhong W, Digre A, Katona B, Sjöstedt E, Butler L, Odeberg J,  
696 Dusart P, Edfors F, Oksvold P, von Feilitzen K, Zwahlen M, Arif M, Altay O, Li X, Ozcan M,  
697 Mardinoglu A, Fagerberg L, Mulder J, Luo Y, Ponten F, Uhlén M, Lindskog C. A single-cell type  
698 transcriptomics map of human tissues. *Sci Adv*. 2021;7(31):eabh2169. doi:  
699 10.1126/sciadv.abh2169.  
700
  - 701 • Keenan TDL, Clemons TE, Domalpally A, Elman MJ, Havilio M, Agrón E, Benyamini G, Chew EY.  
702 Retinal specialist versus artificial intelligence detection of retinal fluid from OCT: Age-Related Eye  
703 Disease Study 2: 10-year follow-on study. *Ophthalmology*. 2021;128(1):100-109. doi:  
704 10.1016/j.ophtha.2020.06.038.  
705
  - 706 • Kirchler M, Konigorski S, Norden M, Meltendorf C, Kloft M, Schurmann C, Lippert C.  
707 transferGWAS: GWAS of images using deep transfer learning. *Bioinformatics*. 2022;38(14):3621-  
708 3628. doi: 10.1093/bioinformatics/btac369.  
709
  - 710 • LeCun Y, Bengio Y, Hinton G. Deep learning. *Nature*. 2015;521(7553):436-44. doi:  
711 10.1038/nature14539.  
712
  - 713 • Le Goallec A, Dai Y, Collin S, Vincent T, Patel CJ. Deep learning of fundus and optical coherence  
714 tomography images enables identification of diverse genetic and environmental factors  
715 associated with eye aging. *bioRxiv*. 2022. doi: 10.1101/2021.06.24.21259471.  
716
  - 717 • Li H, Yu X, Zheng B, Ding S, Mu Z, Guo L. *BMC Ophthalmol*. 2021 May 17;21(1):220. doi:  
718 10.1186/s12886-021-01975-7. Early neurovascular changes in the retina in preclinical diabetic



- 719 retinopathy and its relation with blood glucose. *BMC Ophthalmol.* 2021;21(1):220. doi:  
720 10.1186/s12886-021-01975-7.  
721
- 722 • Mbatchou J, Barnard L, Backman J, Marcketta A, Kosmicki JA, Ziyatdinov A, Benner C,  
723 O'Dushlaine C, Barber M, Boutkov B, Habegger L, Ferreira M, Baras A, Reid J, Abecasis G,  
724 Maxwell E, Marchini J. Computationally efficient whole-genome regression for quantitative and  
725 binary traits. *Nat Genet.* 2021;53(7):1097-1103. doi: 10.1038/s41588-021-00870-7.  
726
  - 727 • Michelucci U. An introduction to autoencoders. *arXiv* 2022. doi: 10.48550/arXiv.2201.03898.  
728
  - 729 • Myers TA, Chanock SJ, Machiela MJ. *LDlinkR*: An R package for rapidly calculating linkage  
730 disequilibrium statistics in diverse populations. *Front Genet.* 2020;11:157. doi:  
731 10.3389/fgene.2020.00157.  
732
  - 733 • Ochoa D, Hercules A, Carmona M, Suveges D, Gonzalez-Uriarte A, Malangone C, Miranda A,  
734 Fumis L, Carvalho-Silva D, Spitzer M, Baker J, Ferrer J, Raies A, Razuvayevskaya O,  
735 Faulconbridge A, Petsalaki E, Mutowo P, Machlitt-Northen S, Peat G, McAuley E, Ong CK,  
736 Mountjoy E, Ghousaini M, Pierleoni A, Papa E, Pignatelli M, Koscielny G, Karim M,  
737 Schwartzentruber J, Hulcoop DG, Dunham I, McDonagh EM. Open Targets Platform: supporting  
738 systematic drug-target identification and prioritisation. *Nucleic Acids Res.* 2021;49(D1):D1302-  
739 D1310. doi: 10.1093/nar/gkaa1027.  
740
  - 741 • Orozco LD, Chen HH, Cox C, Katschke KJ Jr, Arceo R, Espiritu C, Caplazi P, Nghiem SS, Chen  
742 YJ, Modrusan Z, Dressen A, Goldstein LD, Clarke C, Bhangale T, Yaspan B, Jeanne M,  
743 Townsend MJ, van Lookeren Campagne M, Hackney JA. Integration of eQTL and a single-cell  
744 atlas in the human eye identifies causal genes for age-related macular degeneration. *Cell Rep.*  
745 2020;30(4):1246-1259.e6. doi: 10.1016/j.celrep.2019.12.082.  
746
  - 747 • Patel PJ, Foster PJ, Grossi CM, Keane PA, Ko F, Lotery A, Peto T, Reisman CA, Strouthidis NG,  
748 Yang Q; UK Biobank Eyes and Vision Consortium. Spectral-domain optical coherence  
749 tomography imaging in 67 321 adults: Associations with macular thickness in the UK Biobank  
750 Study. *Ophthalmology.* 2016;123(4):829-40. doi: 10.1016/j.ophtha.2015.11.009.  
751
  - 752 • Pers TH, Karjalainen JM, Chan Y, Westra HJ, Wood AR, Yang J, Lui JC, Vedantam S,  
753 Gustafsson S, Esko T, Frayling T, Speliotes EK; Genetic Investigation of ANthropometric Traits  
754 (GIANT) Consortium; Boehnke M, Raychaudhuri S, Fehrmann RS, Hirschhorn JN, Franke L.  
755 Biological interpretation of genome-wide association studies using predicted gene functions. *Nat*  
756 *Commun.* 2015;6:5890. doi: 10.1038/ncomms6890.  
757
  - 758 • Radhakrishnan A, Friedman SF, Khurshid S, Ng K, Batra P, Lubitz SA, Philippakis AA, Uhler C.  
759 Cross-modal autoencoder framework learns holistic representations of cardiovascular state. *Nat*  
760 *Commun.* 2023;14:2436. doi: 10.1038/s41467-023-38125-0.  
761
  - 762 • Roman TS, Cannon ME, Vadlamudi S, Buchkovich ML, Wolford BN, Welch RP, Morken MA,  
763 Kwon GJ, Varshney A, Kursawe R, Wu Y, Jackson AU; National Institutes of Health Intramural  
764 Sequencing Center (NISC) Comparative Sequencing Program; Erdos MR, Kuusisto J, Laakso M,  
765 Scott LJ, Boehnke M, Collins FS, Parker SCJ, Stitzel ML, Mohlke KL. A Type 2 diabetes-  
766 associated functional regulatory variant in a pancreatic islet enhancer at the ADCY5 locus.  
767 *Diabetes.* 2017;66(9):2521-2530. doi: 10.2337/db17-0464.  
768
  - 769 • Ronneberger O, Fischer P, Brox T. U-Net: Convolutional networks for biomedical image  
770 segmentation. *arXiv.* 2015. doi: 10.48550/arXiv.1505.04597.  
771
  - 772 • Schroff F, Kalenichenko D, Philbin J. FaceNet: A unified embedding for face recognition and  
773 clustering. *arXiv.* 2015. doi: 10.48550/arXiv.1503.03832.  
774

- 775 • Oren O, Gersh BJ, Bhatt DL. Artificial intelligence in medical imaging: switching from radiographic  
776 pathological data to clinically meaningful endpoints. *Lancet Digit Health*. 2020;2(9):e486-e488.  
777 doi: 10.1016/S2589-7500(20)30160-6.  
778
- 779 • Sheffield VC, Stone EM. Genomics and the eye. *N Engl J Med*. 2011;364(20):1932-42. doi:  
780 10.1056/NEJMra1012354.  
781
- 782 • Shi Y, Zhang W, Yang Y, Murzin AG, Falcon B, Kotecha A, van Beers M, Tarutani A, Kametani F,  
783 Garringer HJ, Vidal R, Hallinan GI, Lashley T, Saito Y, Murayama S, Yoshida M, Tanaka H,  
784 Kakita A, Ikeuchi T, Robinson AC, Mann DMA, Kovacs GG, Revesz T, Ghetti B, Hasegawa M,  
785 Goedert M, Scheres SHW. Structure-based classification of tauopathies. *Nature*.  
786 2021;598(7880):359-363. doi: 10.1038/s41586-021-03911-7.  
787
- 788 • Sollis E, Mosaku A, Abid A, Buniello A, Cerezo M, Gil L, Groza T, Güneş O, Hall P, Hayhurst J,  
789 Ibrahim A, Ji Y, John S, Lewis E, MacArthur JAL, McMahon A, Osumi-Sutherland D,  
790 Panoutsopoulou K, Pendlington Z, Ramachandran S, Stefancsik R, Stewart J, Whetzel P, Wilson  
791 R, Hindorff L, Cunningham F, Lambert SA, Inouye M, Parkinson H, Harris LW. The NHGRI-EBI  
792 GWAS Catalog: knowledgebase and deposition resource. *Nucleic Acids Res*. 2023;51(D1):D977-  
793 D985. doi: 10.1093/nar/gkac1010  
794
- 795 • Song H, Xiang Y, Jegelka S, Savarese S. Deep metric learning via lifted structured feature  
796 embedding. *arXiv* 2015. doi: 10.48550/arXiv.1511.06452.  
797
- 798 • Stefansson H, Helgason A, Thorleifsson G, Steinthorsdottir V, Masson G, Barnard J, Baker A,  
799 Jonasdottir A, Ingason A, Gudnadottir VG, Desnica N, Hicks A, Gylfason A, Gudbjartsson DF,  
800 Jonsdottir GM, Sainz J, Agnarsson K, Birgisdottir B, Ghosh S, Olafsdottir A, Cazier JB,  
801 Kristjansson K, Frigge ML, Thorgeirsson TE, Gulcher JR, Kong A, Stefansson K. A common  
802 inversion under selection in Europeans. *Nat Genet*. 2005;37(2):129-37. doi: 10.1038/ng1508.  
803
- 804 • Steinberg KM, Antonacci F, Sudmant PH, Kidd JM, Campbell CD, Vives L, Malig M, Scheinfeldt L,  
805 Beggs W, Ibrahim M, Lema G, Nyambo TB, Omar SA, Bodo JM, Froment A, Donnelly MP, Kidd  
806 KK, Tishkoff SA, Eichler EE. Structural diversity and African origin of the 17q21.31 inversion  
807 polymorphism. *Nat Genet*. 2012;44(8):872-80. doi: 10.1038/ng.2335.  
808
- 809 • Thomas ED, Timms AE, Giles S, Harkins-Perry S, Lyu P, Hoang T, Qian J, Jackson VE, Bahlo M,  
810 Blackshaw S, Friedlander M, Eade K, Cherry T.J. Cell-specific cis-regulatory elements and  
811 mechanisms of non-coding genetic disease in human retina and retinal organoids. *Dev Cell*.  
812 2022;57(6):820-836.e6. doi: 10.1016/j.devcel.2022.02.018.  
813
- 814 • Turley P, Walters RK, Maghjian O, Okbay A, Lee JJ, Fontana MA, Nguyen-Viet TA, Wedow R,  
815 Zacher M, Furlotte NA; 23andMe Research Team; Social Science Genetic Association  
816 Consortium; Magnusson P, Oskarsson S, Johannesson M, Visscher PM, Laibson D, Cesarini D,  
817 Neale BM, Benjamin DJ. Multi-trait analysis of genome-wide association summary statistics using  
818 MTAG. *Nat Genet*. 2018;50(2):229-237. doi: 10.1038/s41588-017-0009-4.  
819
- 820 • Wang Y, Mandelkew E. Tau in physiology and pathology. *Nat Rev Neurosci*. 2016;17(1):5-21. doi:  
821 10.1038/nrn.2015.1.  
822
- 823 • Xie Z, Zhang T, Kim S, Lu J, Zhang W, Lin C, Wu M, Davis A, Channa R, Giancardo L, Chen H,  
824 Wang S, Chen R, Zhi D. iGWAS: image-based genome-wide association of self-supervised deep  
825 phenotyping of human medical images. *medRxiv* 2023. doi: 10.1101/2022.05.26.22275626.  
826
- 827 • Yang J, Ferreira T, Morris AP, Medland SE; Genetic Investigation of ANthropometric Traits  
828 (GIANT) Consortium; DIAbetes Genetics Replication And Meta-analysis (DIAGRAM) Consortium;  
829 Madden PA, Heath AC, Martin NG, Montgomery GW, Weedon MN, Loos RJ, Frayling TM,  
830 McCarthy MI, Hirschhorn JN, Goddard ME, Visscher PM. Conditional and joint multiple-SNP

- 831 analysis of GWAS summary statistics identifies additional variants influencing complex traits. *Nat*  
832 *Genet.* 2012;44(4):369-75, S1-3. doi: 10.1038/ng.2213.  
833
- 834 • Yim J, Chopra R, Spitz T, Winkens J, Obika A, Kelly C, Askham H, Lukic M, Huemer J, Fasler K,  
835 Moraes G, Meyer C, Wilson M, Dixon J, Hughes C, Rees G, Khaw PT, Karthikesalingam A, King  
836 D, Hassabis D, Suleyman M, Back T, Ledsam JR, Keane PA, De Fauw J. Predicting conversion  
837 to wet age-related macular degeneration using deep learning. *Nat Med.* 2020;26(6):892-899. doi:  
838 10.1038/s41591-020-0867-7.  
839
- 840 • Zekavat SM, Jorshery SD, Shweikh Y, Horn K, Rauscher FG, Sekimitsu S, Kayoma S, Ye Y,  
841 Raghu V, Zhao H, Ghassemi M, Elze T, Segre AV, Wiggs JL, Scholz M, Del Priore L, Wang JC,  
842 Natarajam P, Zebardast N. medRxiv 2023. doi: 10.1101/2023.05.16.23290063  
843
- 844
- 845 • Zhao B, Li Y, Fan Z, Wu Z, Shu J, Yang X, Yang Y, Wang X, Li B, Wang X, Copana C, Yang Y,  
846 Lin J, Li Y, Stein JL, O'Brien JM, Li T, Zhu H. Eye-brain connections revealed by multimodal  
847 retinal and brain imaging genetics in the UK Biobank. *medRxiv* 2023. doi:  
848 10.1101/2023.02.16.23286035  
849  
850

851 **ACKNOWLEDGEMENTS**

852

853 We acknowledge the following sources of funding: the Wellcome Trust (224643/Z/21/Z,  
854 Clinical Research Career Development Fellowship to P.I.S.); the UK National Institute for  
855 Health Research (NIHR) Clinical Lecturer Programme (CL-2017-06-001 to P.I.S.); the EMBL  
856 European Bioinformatics Institute (EMBL-EBI) (A.D., K.G., E.B., T.F.). This research was co-  
857 funded by the NIHR Manchester Biomedical Research Centre (NIHR203308). The views  
858 expressed are those of the author(s) and not necessarily those of the NIHR or the  
859 Department of Health and Social Care.

860

861 We also acknowledge the contribution of the UK Biobank Eye and Vision Consortium.  
862 Members of this consortium include: Naomi Allen, Tariq Aslam, Denize Atan, Sarah Barman,  
863 Jenny Barrett, Paul Bishop, Graeme Black, Tasanee Braithwaite, Roxana Carare, Usha  
864 Chakravarthy, Michelle Chan, Sharon Chua, Alexander Day, Parul Desai, Bal Dhillon,  
865 Andrew Dick, Alexander Doney, Cathy Egan, Sarah Ennis, Paul Foster, Marcus Fruttiger,  
866 John Gallacher, David Garway-Heath, Jane Gibson, Jeremy Guggenheim, Chris Hammond,  
867 Alison Hardcastle, Simon Harding, Ruth Hogg, Pirro Hysi, Pearse Keane, Peng Tee Khaw,  
868 Anthony Khawaja, Gerassimos Lascaratos, Thomas Littlejohns, Andrew Lotery, Robert  
869 Luben, Phil Luthert, Tom Macgillivray, Sarah Mackie, Savita Madhusudhan, Bernadette  
870 Mcguinness, Gareth Mckay, Martin Mckibbin, Tony Moore, James Morgan, Eoin O'Sullivan,  
871 Richard Oram, Chris Owen, Praveen Patel, Euan Paterson, Tunde Peto, Axel Petzold,  
872 Nikolas Pontikos, Jugnoo Rahi, Alicja Rudnicka, Naveed Sattar, Jay Self, Panagiotis  
873 Sergouniotis, Sobha Sivaprasad, David Steel, Irene Stratton, Nicholas Strouthidis, Cathie  
874 Sudlow, Zihan Sun, Robyn Tapp, Dhanes Thomas, Emanuele Trucco, Adnan Tufail, Ananth  
875 Viswanathan, Veronique Vitart, Mike Weedon, Cathy Williams, Katie Williams, Jayne  
876 Woodside, Max Yates, Jennifer Yip, Yalin Zheng.

877

878 The UK Biobank Eye and Vision Consortium is supported by funding from the NIHR  
879 Biomedical Research Centre at Moorfields Eye Hospital and UCL Institute of Ophthalmology,  
880 the Alcon Foundation and the Desmond Foundation.

881

882

883 **AUTHOR CONTRIBUTIONS STATEMENT**

884

885 P.I.S., E.B. and T.F. conceived and designed the experiments. P.I.S., A.D., K.G., E.B. and  
886 T.F. analysed the data. P.I.S. and T.F. wrote the manuscript with support from E.B.. All  
887 authors critically revised and approved the manuscript.

888

889

890 **COMPETING INTERESTS STATEMENT**

891

892 E.B. is a paid consultant and equity holder of Oxford Nanopore, a paid consultant to  
893 Dovetail, and a non-executive director of Genomics England, a limited company wholly  
894 owned by the UK Department of Health and Social Care. All other authors declare no  
895 competing interests.

# UK Biobank data quality control

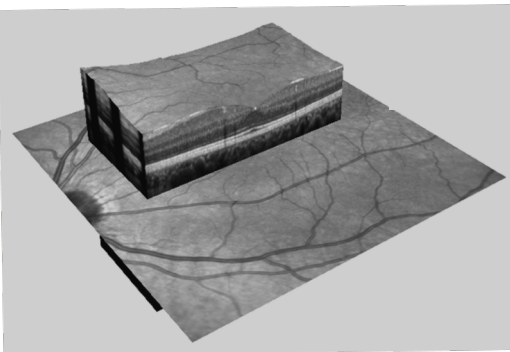

**study subjects**  
67,321  
↓ QC  
31,135

# manual segmentation → U-net segmentation

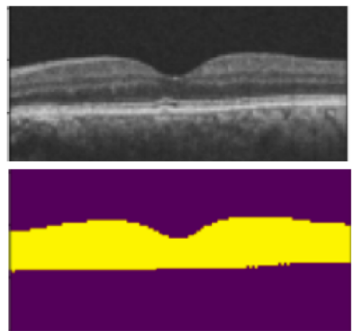

100 OCT images

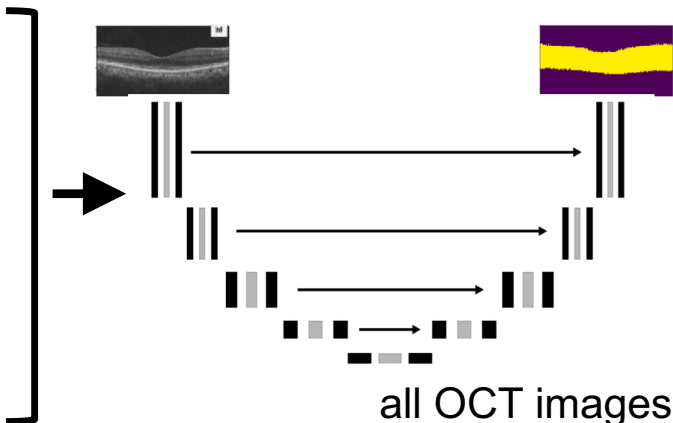

# OCT thickness map generation

in each study subject

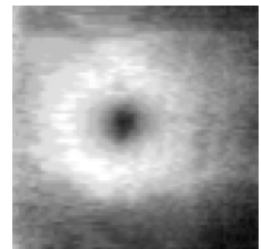

**raw data:** 128 images  
in raster pattern  
↓ U-net  
**autoencoder input:**  
single thickness map

# autoencoder application to OCT thickness maps

2500 training  
500 testing

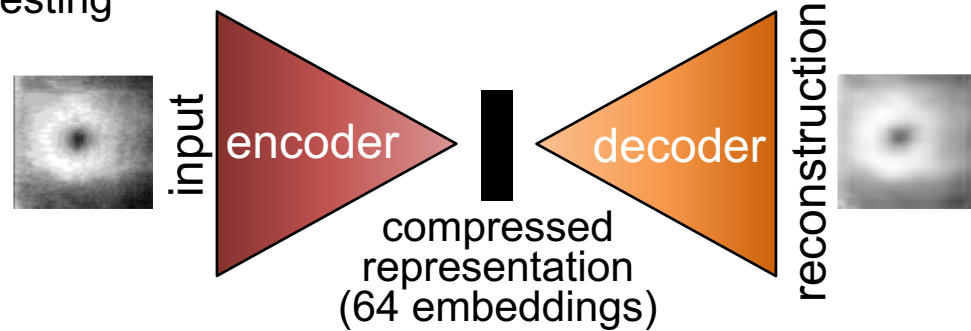

A

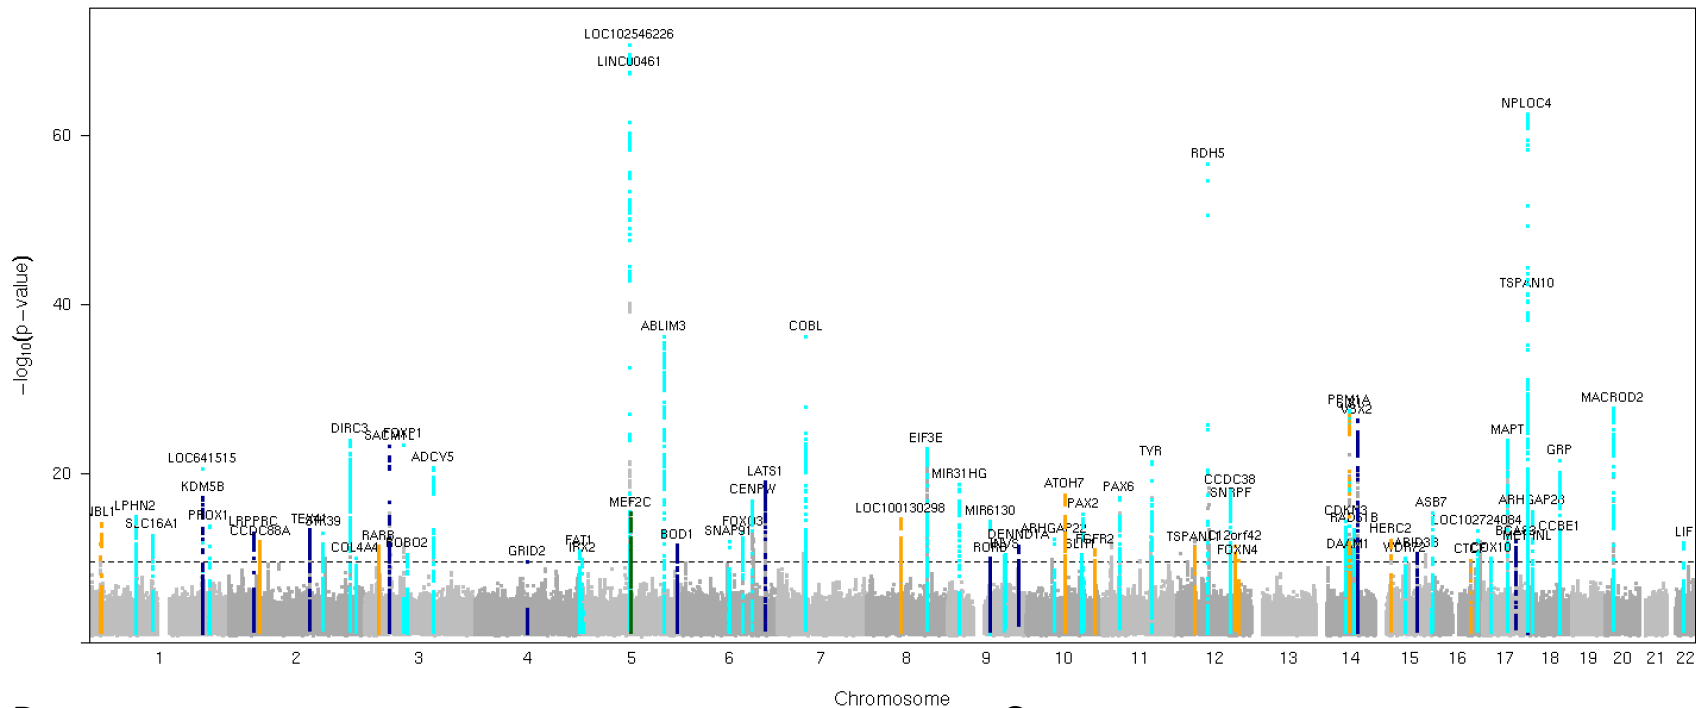

B

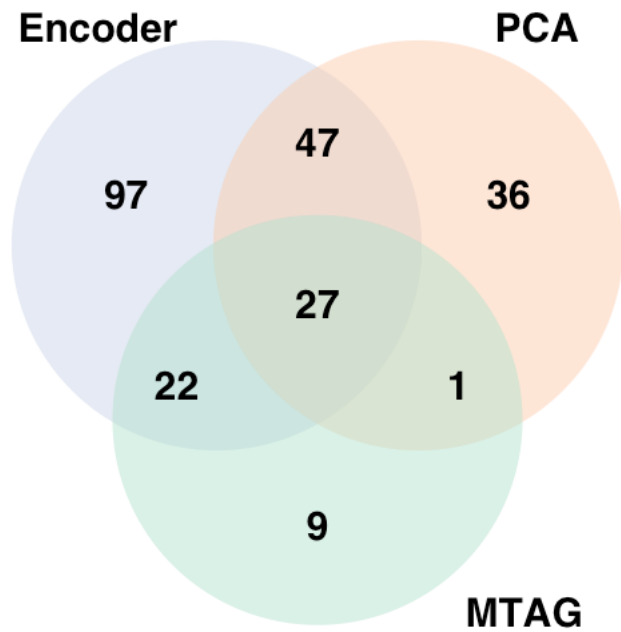

C

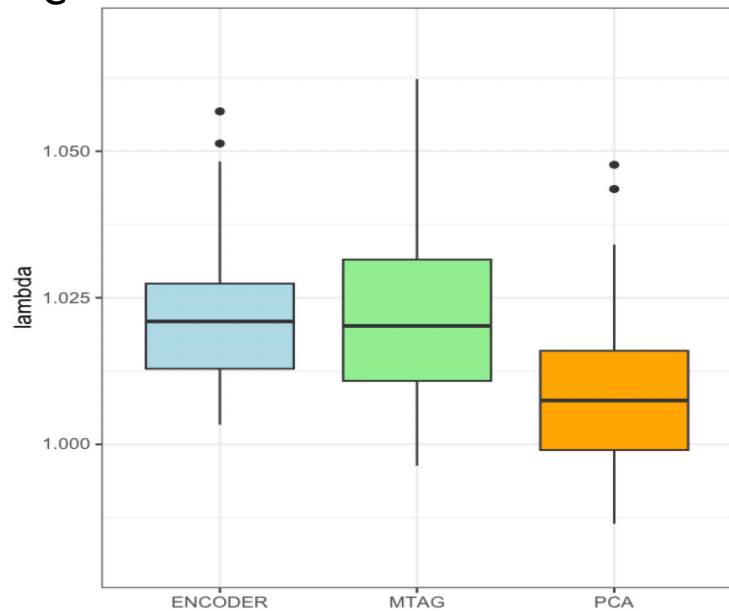

A

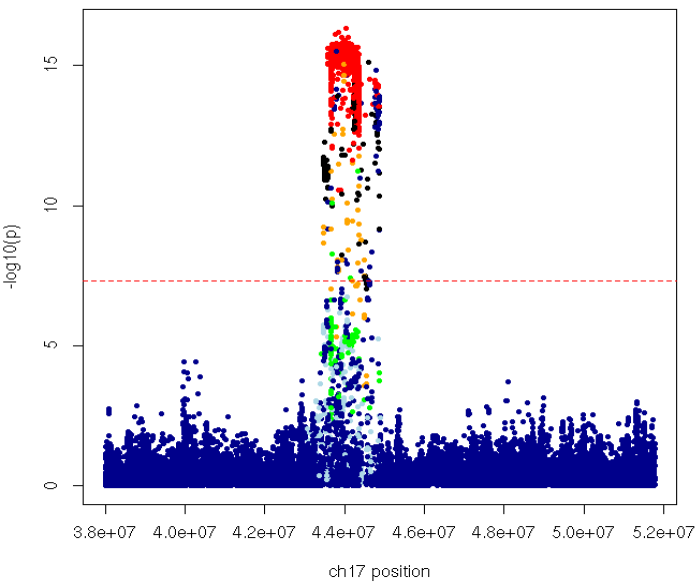

B

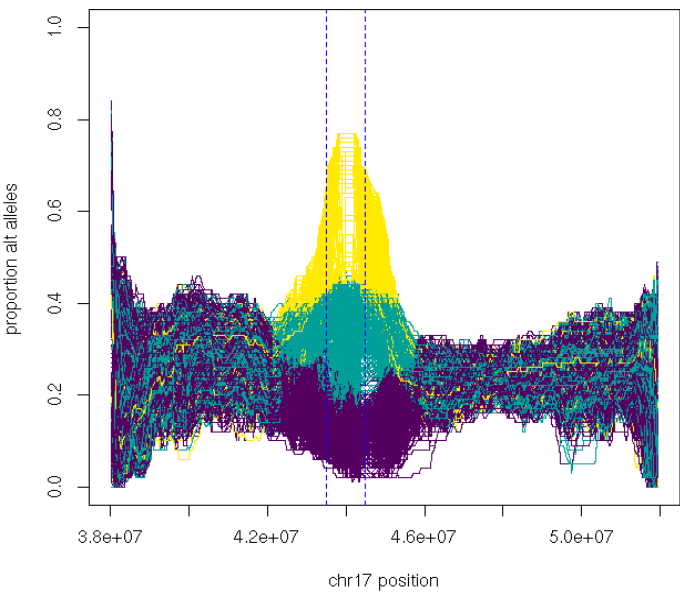

C

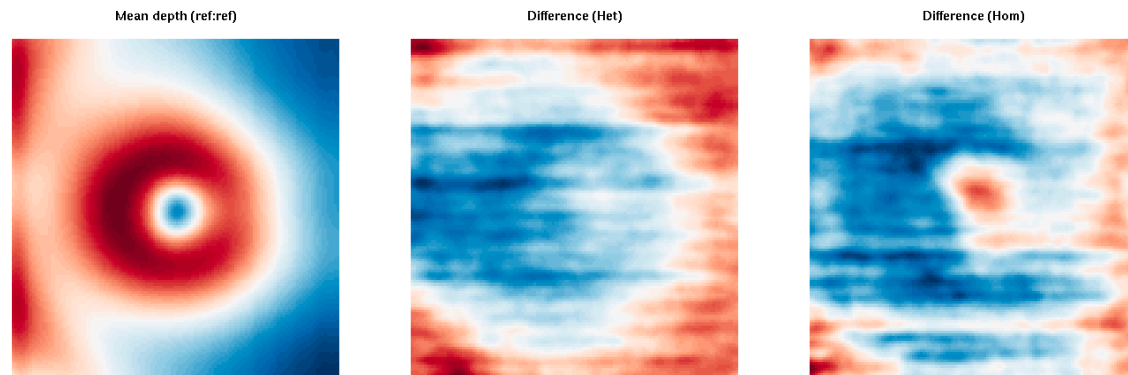

D

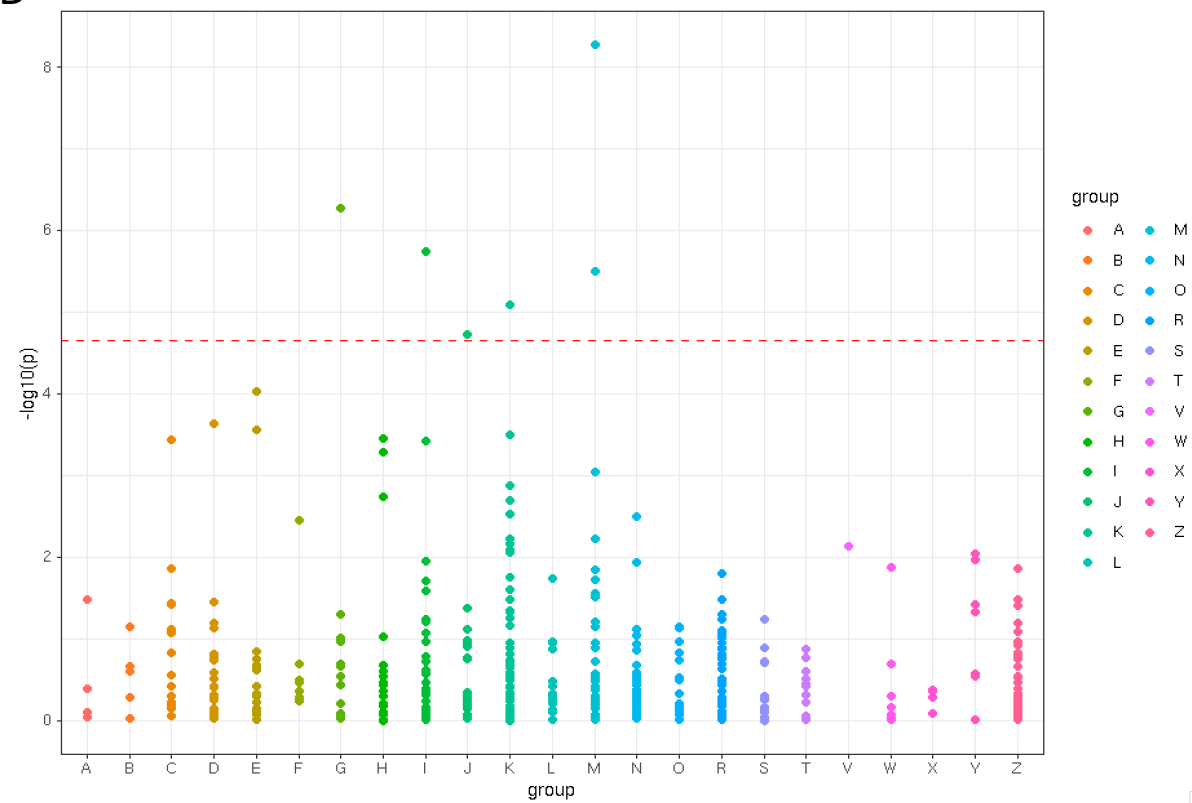



A

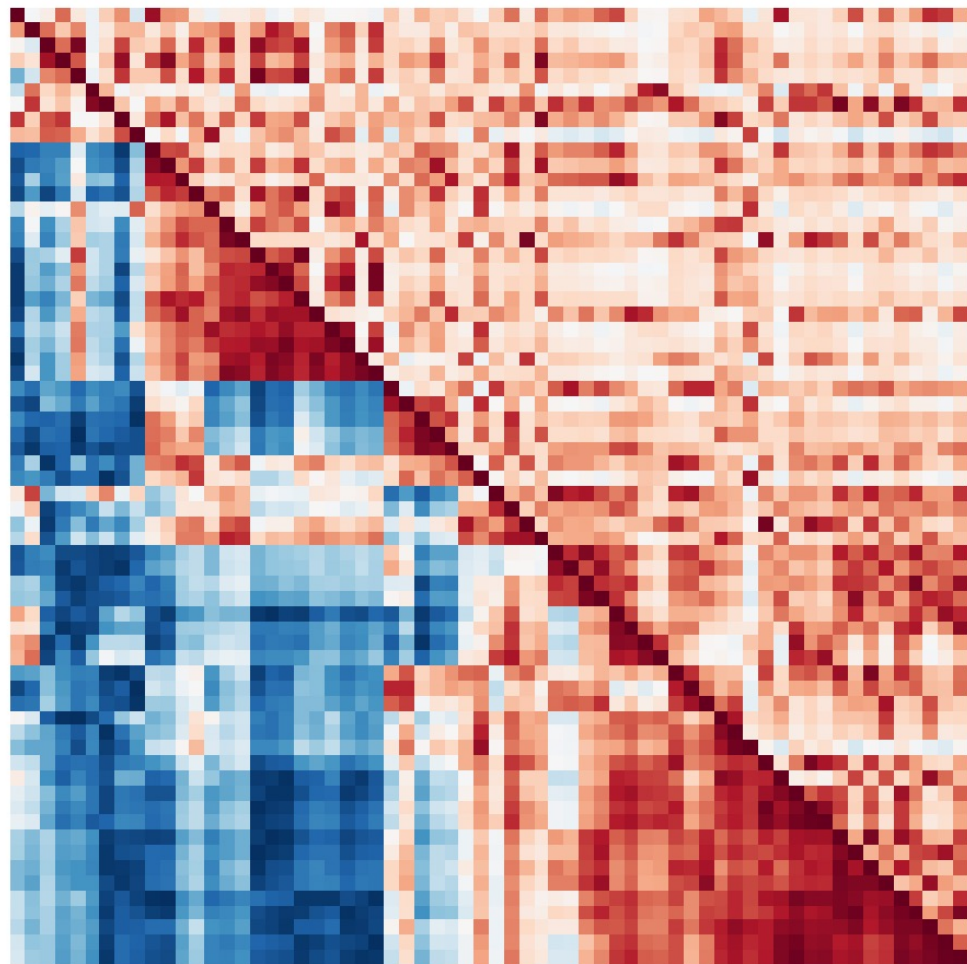

embedding\_36  
embedding\_64  
embedding\_55  
embedding\_44  
embedding\_54  
embedding\_1  
embedding\_12  
embedding\_46  
embedding\_35  
embedding\_26  
embedding\_51  
embedding\_58  
embedding\_7  
embedding\_53  
embedding\_63  
embedding\_61  
embedding\_52  
embedding\_17  
embedding\_59  
embedding\_60  
embedding\_8  
embedding\_32  
embedding\_41  
embedding\_33  
embedding\_42  
embedding\_25  
embedding\_16  
embedding\_50  
embedding\_23  
embedding\_34  
embedding\_6  
embedding\_22  
embedding\_31  
embedding\_21  
embedding\_30  
embedding\_18  
embedding\_9  
embedding\_2  
embedding\_15  
embedding\_24  
embedding\_47  
embedding\_48  
embedding\_49  
embedding\_5  
embedding\_37  
embedding\_10  
embedding\_4  
embedding\_3  
embedding\_13  
embedding\_29  
embedding\_14  
embedding\_39  
embedding\_11  
embedding\_20  
embedding\_38  
embedding\_28  
embedding\_19

B

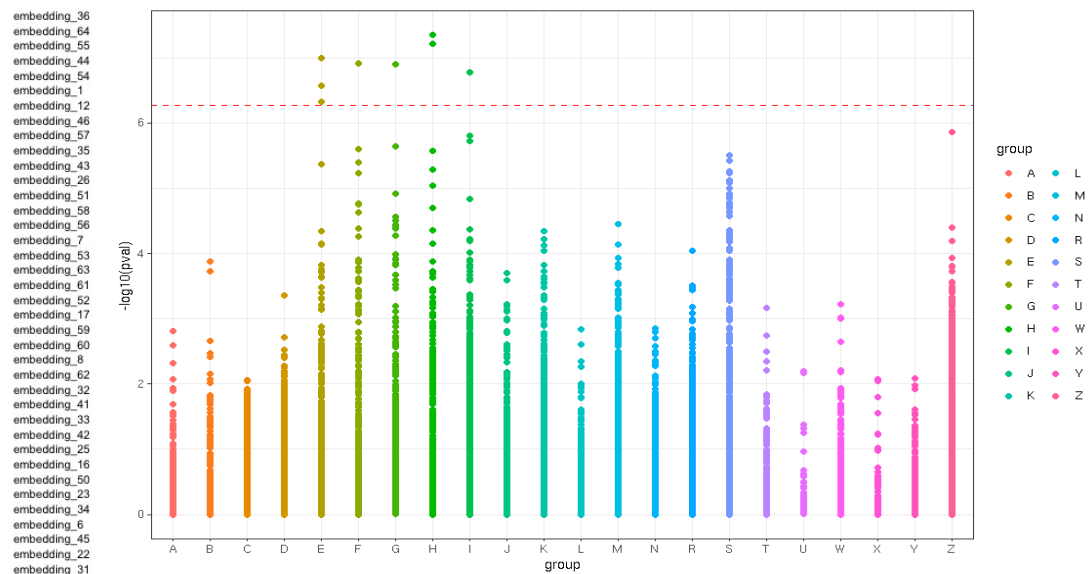

C

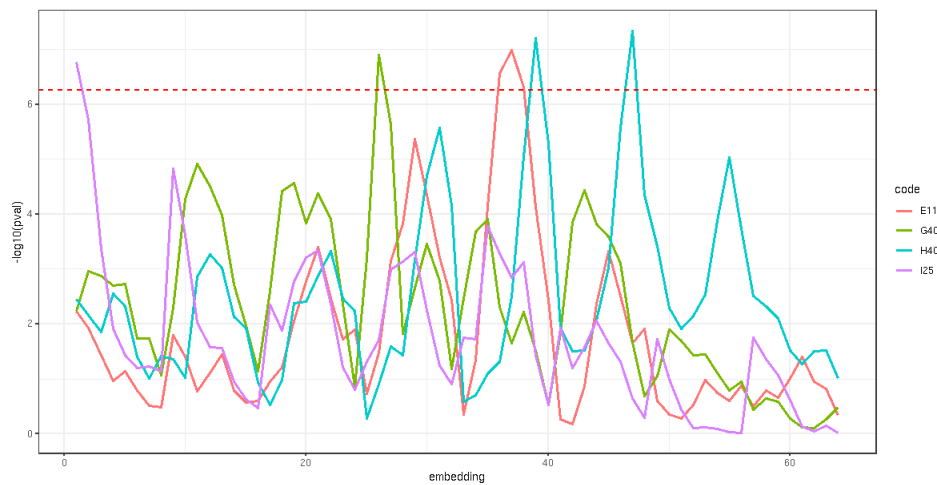

D

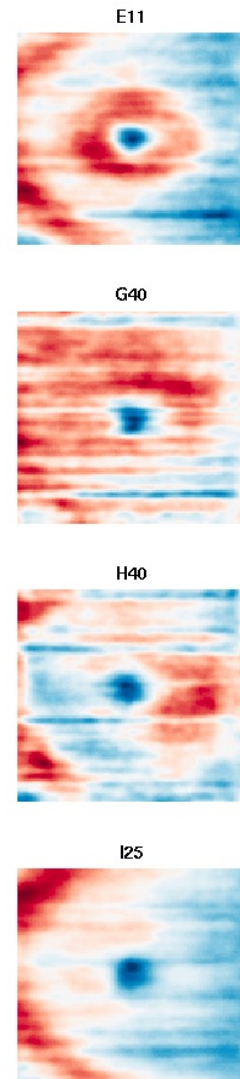

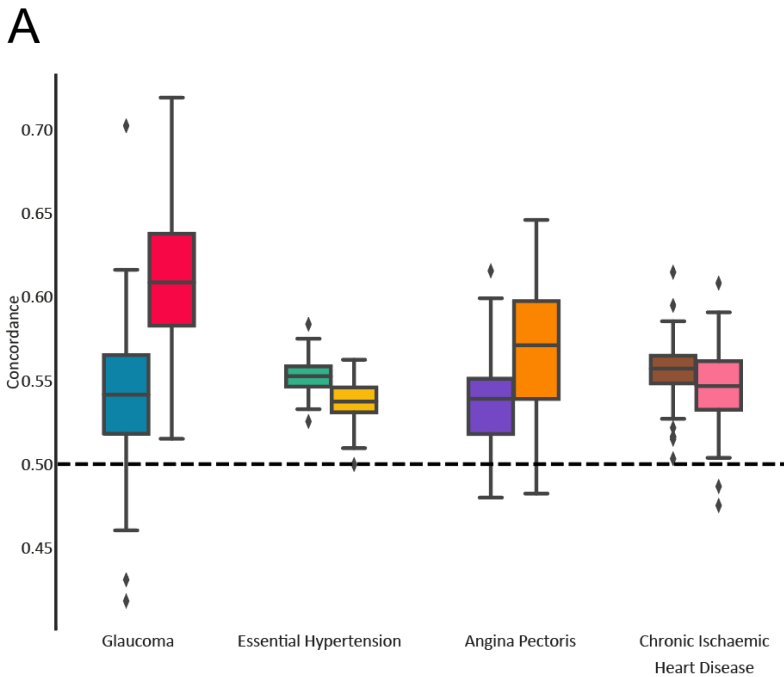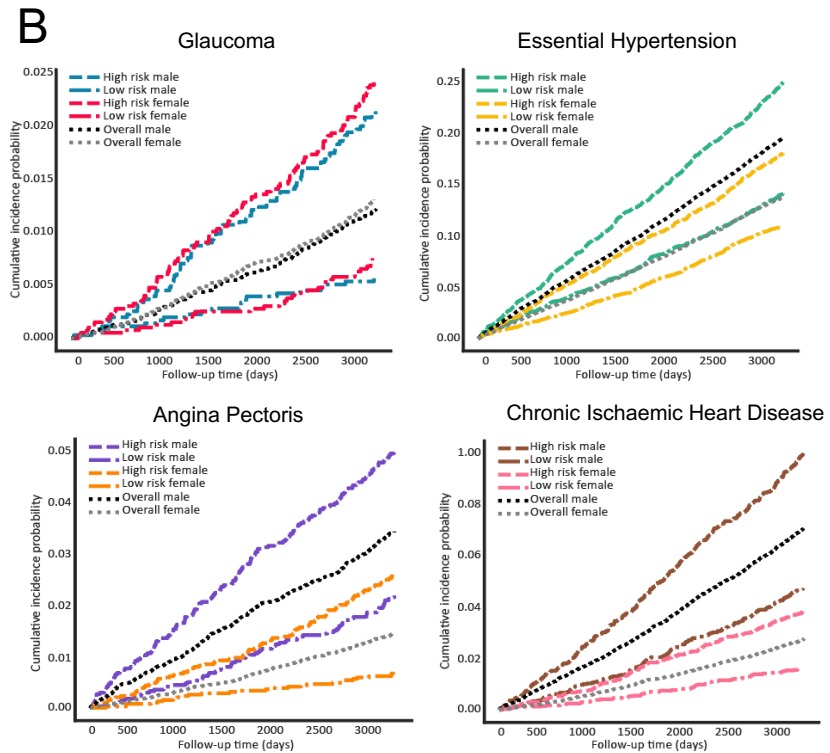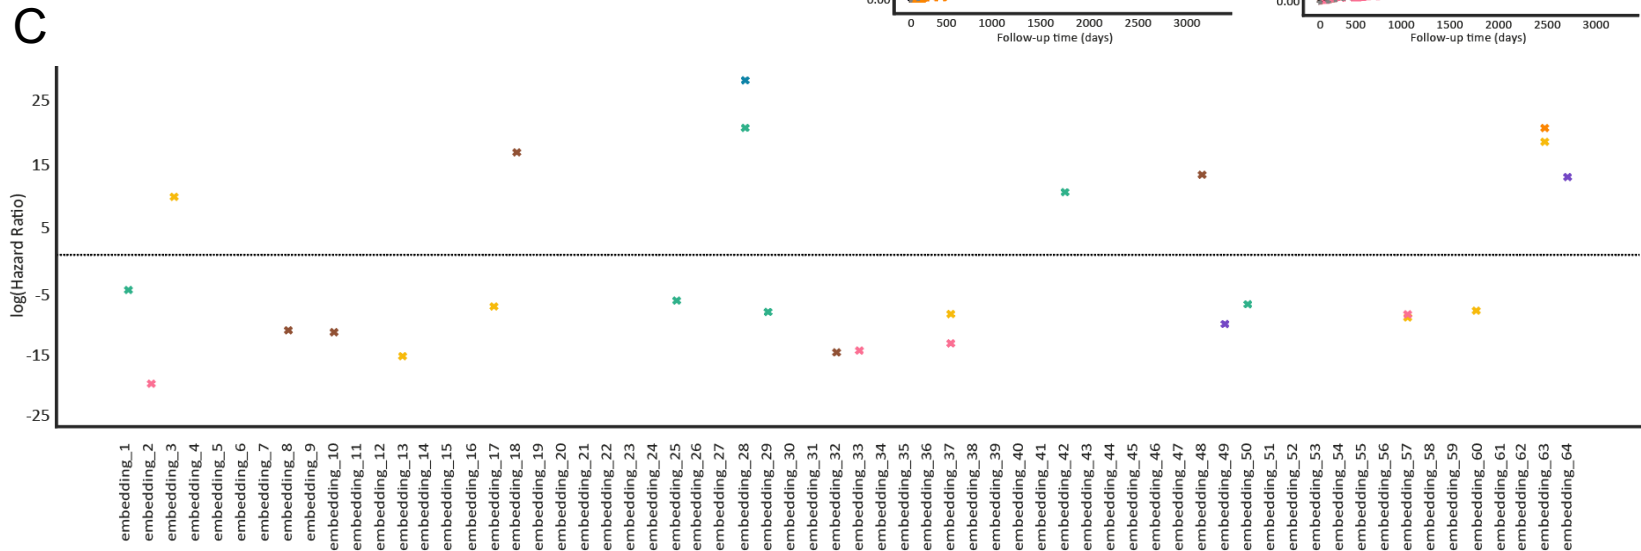

Source: https://medrxiv.org/content/10.1101/2023.06.15.23291410v2.full.pdf
